1 Title:

2 Personalized alpha-tACS targeting left posterior parietal cortex modulates visuo-spatial  
3 attention and posterior evoked EEG activity

4

5

6 Author information:

7 Radecke, Jan-Ole<sup>a,\*,#</sup>, Fiene, Marina<sup>a</sup>, Misselhorn, Jonas<sup>a</sup>, Herrmann, Christoph S.<sup>b,c,d</sup>, Engel,  
8 Andreas K.<sup>a</sup>, Wolters, Carsten H.<sup>e,f</sup> & Schneider, Till R.<sup>a</sup>

9

10 <sup>a</sup> Department of Neurophysiology and Pathophysiology, University Medical Center Hamburg-  
11 Eppendorf, 20246 Hamburg, Germany

12 <sup>b</sup> Experimental Psychology Lab, Department of Psychology, University of Oldenburg, 26111  
13 Oldenburg, Germany

14 <sup>c</sup> Research Center Neurosensory Science, University of Oldenburg, 26111 Oldenburg, Germany

15 <sup>d</sup> Cluster of Excellence "Hearing4all"

16 <sup>e</sup> Institute for Biomagnetism and Biosignalanalysis, University of Münster, 48149 Münster,  
17 Germany

18 <sup>f</sup> Otto Creutzfeldt Center for Cognitive and Behavioral Neuroscience, University of Münster,  
19 48149 Münster, Germany

20

21 \* Corresponding author at: Department of Neurophysiology and Pathophysiology, University  
22 Medical Center Hamburg-Eppendorf, Martinistr. 52, 20251 Hamburg, Germany;  
23 [janole.radecke@uni-luebeck.de](mailto:janole.radecke@uni-luebeck.de)

24 # Current address: Department of Psychiatry and Psychotherapy, University of Lübeck, Germany  
25 and Center for Brain, Behavior and Metabolism (CBBM), University of Lübeck, Germany

26

27

1 **Personalized alpha-tACS targeting left posterior parietal cortex modulates**  
2 **visuo-spatial attention and posterior evoked EEG activity**

3

4 **Abstract**

5 Background: Covert visuo-spatial attention is marked by the anticipatory lateralization of  
6 neuronal alpha activity in the posterior parietal cortex. Previous applications of transcranial  
7 alternating current stimulation (tACS) at the alpha frequency, however, were inconclusive  
8 regarding the causal contribution of oscillatory activity during visuo-spatial attention.

9 Objective: Attentional shifts of behavior and electroencephalography (EEG) after-effects were  
10 assessed in a cued visuo-spatial attention paradigm. We hypothesized that parietal alpha-tACS  
11 facilitates attention in the ipsilateral visual hemifield. Furthermore, we assumed that  
12 modulations of behavior and neurophysiology are related to individual electric field  
13 simulations.

14 Methods: We applied personalized tACS at alpha and gamma frequencies to elucidate the role  
15 of oscillatory neuronal activity for visuo-spatial attention. Personalized tACS montages were  
16 algorithmically optimized to target individual left and right parietal regions that were defined  
17 by an EEG localizer.

18 Results: Behavioral performance in the left hemifield was specifically increased by alpha-tACS  
19 compared to gamma-tACS targeting the left parietal cortex. This hemisphere-specific effect  
20 was observed despite the symmetry of simulated electric fields. In addition, visual event-  
21 related potential (ERP) amplitudes showed a reduced lateralization over posterior sites  
22 induced by left alpha-tACS. Neuronal sources of this effect were localized in the left premotor  
23 cortex. Interestingly, accuracy modulations induced by left parietal alpha-tACS were directly  
24 related to electric field magnitudes in the left premotor cortex.

25 Conclusion: Overall, results corroborate the notion that alpha lateralization plays a causal role  
26 in covert visuo-spatial attention and indicate an increased susceptibility of parietal and  
27 premotor brain regions of the left dorsal attention network to subtle tACS-neuromodulation.

28

29 **Keywords:** visuo-spatial attention; electroencephalography; personalized tES; non-invasive  
30 brain stimulation; finite element method; electric field simulation

## 31 Introduction

32 Shifts of covert visuo-spatial attention have been repeatedly associated with a  
33 lateralization of neuronal alpha activity along the dorsal attention network [1–3]. Specifically,  
34 an increase of cue-related neuronal alpha power has been described in middle and superior  
35 occipital cortex, in posterior parietal cortex along the intraparietal sulcus (IPS), as well as  
36 premotor regions in the cerebral hemisphere ipsilateral to the attended hemifield, relative to  
37 the contralateral hemisphere [1,2]. This activity projects to posterior sensors in  
38 magnetoencephalography (MEG) [3–5, see also 6] and electroencephalography (EEG) studies  
39 [7–12] and has been related to the active inhibition of unattended space [9–14]. In parallel,  
40 cue event-related potentials (ERPs) showed amplitude variations that were increased over  
41 posterior sensors ipsilateral to the attended hemifield [6,15, cf. 16]. In contrast, in response to  
42 subsequent visual target stimuli, a relative increase of posterior neuronal gamma activity [1,2]  
43 and ERP amplitudes [17–19] contralateral to the attended hemifield has been described,  
44 reflecting the facilitated processing of attended stimuli [20,21].

45 To elucidate the role of neuronal alpha oscillations during visuo-spatial attention beyond  
46 correlative evidence, transcranial alternating current stimulation (tACS) can be applied to  
47 modulate neuronal dynamics, thereby affecting neuronal synchrony and power at the  
48 stimulation frequency [22–24]. Especially tACS in the alpha frequency band has been reported  
49 to specifically modulate cortical alpha power [23], showing after-effects that outlast the actual  
50 stimulation period [25–29]. During visuo-spatial attention experiments, tACS in the alpha  
51 frequency range has been repeatedly applied over the left [30–33] or right parietal cortex  
52 [31,34–37]. However, the observed behavioral tACS-effects showed limited replicability,  
53 hampering the interpretation of neuronal alpha activity as being causal for visuo-spatial  
54 attention [32,34,36]. In none of these studies, individual stimulation targets or electric field  
55 properties were estimated to validate the potential efficacy of tACS.

56 In a series of simulations of transcranial electric fields using the finite element method  
57 (FEM), interindividual anatomical variability, and thus variability in the magnitude, spatial  
58 extent, and orientation of the induced electric field, was identified as a key factor limiting the  
59 effects of transcranial electrical stimulation [38–45]. Only recently, the topology and  
60 magnitude of individual electric fields have been reported to correlate with the strength of  
61 tACS-modulations of neuronal activity [23,46]. Thus, by using algorithmic optimization of  
62 individual stimulation montages, personalized tACS has the potential to increase control over

63 the topology and orientation of the electric fields relative to a given stimulation target [47,48].  
64 In addition, this approach allows the post-hoc analysis of the estimated electric fields in  
65 conjunction with behavioral or neurophysiological outcome measures of tACS [23,45,cf.  
66 46,48].

67 Here, we present an application of personalized alpha-tACS, specifically targeting  
68 individual sources of neuronal alpha power in the left and right parietal cortices. Parietal alpha  
69 power sources were defined based on individual localizer data recorded with high-density EEG.  
70 Individual FEM head models were utilized for EEG source imaging, simulations of transcranial  
71 electric fields and algorithmic optimization of tACS montages. The posterior parietal cortex  
72 along the IPS was chosen as stimulation target as it acts as an important hub within the  
73 bilateral dorsal attention network [2,49–51]. Gamma-tACS was applied as a control condition,  
74 expecting antagonistic effects compared to alpha-tACS [31,52,53]. In a covert visuo-spatial  
75 attention paradigm we investigated tACS modulation of behavior and tACS after-effects in the  
76 EEG, as well as their relation to individual electric field simulations.

77 We hypothesized that the application of personalized alpha-tACS may increase the  
78 intrinsic neuronal alpha power within the targeted left or right parietal cortex, thereby  
79 facilitating active inhibition of attended stimuli in the visual hemifield contralateral to the  
80 targeted hemisphere. This is expected to lead to a relative facilitation of behavior in response  
81 to stimuli presented ipsilateral to the hemisphere targeted by alpha-tACS. Based on previous  
82 evidence [25–29], we expected that this tACS-modulation may not only be observed during  
83 tACS (tACS<sub>ON</sub>), but also elicit after-effects on the behavioral and neurophysiological level  
84 (tACS<sub>OFF</sub>).

85

## 86 **Materials and methods**

### 87 **Participants and procedure**

88 Twenty-two right-handed participants (12 female, 10 male,  $27.7 \pm 4.2$  years [range 20  
89 to 38]) were included in this study. All participants reported no history of neurological or  
90 psychiatric disorders and had normal or corrected-to-normal visual acuity and normal hearing.  
91 Participants were reimbursed for participation, gave written informed consent in line with the  
92 declaration of Helsinki and the protocol was approved by the ethics committee of the  
93 Hamburg Medical Association (Ärztchamber Hamburg, PV5338). During four pseudo-  
94 randomized sessions, personalized alpha- or gamma-tACS was applied targeting either the left

95 or the right parietal cortex, while participants completed a cued visuo-spatial attention task  
96 (Fig. 1). Detailed descriptions of the methods are provided in the supplementary materials.

97 **Figure 1. Experimental Design.** A) A cued visuo-  
98 spatial attention paradigm was employed. In each  
99 trial, a baseline period was followed by a tone that  
100 indicated whether to attend the left or right  
101 hemifield during the following cue-stimulus interval.  
102 Bilateral random dot kinematograms were  
103 presented for up to 3 s, followed by the inter-trial  
104 interval. Participants indicated via button press  
105 whether the random dots moved up- or downwards  
106 in the attended hemifield. B) Percentage of dots  
107 moving coherently either up- or downwards.  
108 Random dots were presented with two difficulties  
109 relative to the individually titrated threshold. Mean  
110  $\pm$  standard deviations are depicted. C) Top: In a full  
111 within subject design, personalized tACS-montages  
112 were estimated using structural MRI data and  
113 localizer EEG data. Structural MRI data were  
114 employed to build realistic headmodels and  
115 optimize tACS-montages to target individual alpha sources in the left and right parietal cortex. Four tACS  
116 conditions (alpha-left, al; gamma-left, gl; alpha-right, ar; gamma-right, gr; counter-balanced across participants)  
117 were applied targeting either the left or right parietal cortex using alpha-tACS (10 Hz) or gamma-tACS (47.1 Hz).  
118 Average electric field magnitudes are shown, interpolated on the cortical surface of the MNI brain, viewed from  
119 top. Bottom: During each tACS-session, an intermittent stimulation protocol was employed. After an initial 15  
120 min tACS<sub>ON</sub> interval, short intervals without tACS (tACS<sub>OFF</sub>) were interleaved by short tACS<sub>ON</sub> intervals (breaks are  
121 not shown). During all tACS<sub>ON</sub> and tACS<sub>OFF</sub> intervals participants conducted the cued visuo-spatial attention task.

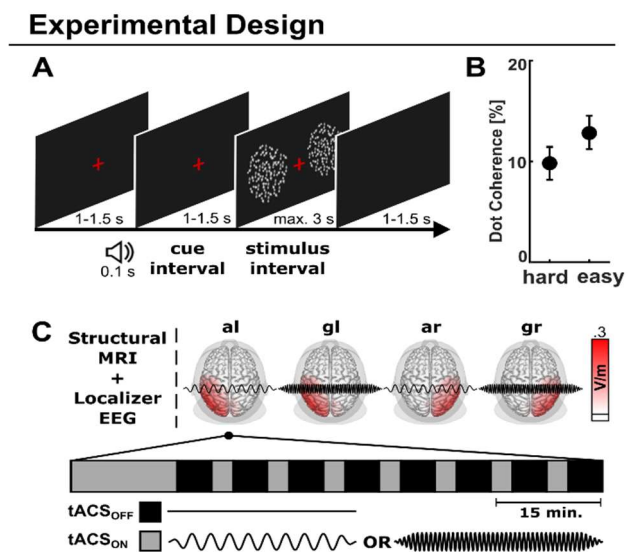

## 122 Cued visuo-spatial attention paradigm

123 A cued visuo-spatial attention paradigm was utilized to probe participants when  
124 attending to the left versus the right hemifield. In each trial, participants were presented with  
125 one of two sinusoidal auditory cue stimuli (440 Hz or 880 Hz) [cf. 9]. Cues indicated participants  
126 to shift their attention to either the left or the right hemifield while focusing on a red central  
127 fixation cross. After a delay period, bilateral random dot kinematograms were presented  
128 [1,4,cf. 54,55]. Random dots moved with 11.5°/s with a proportion of dots coherently moving  
129 upwards or downwards at individually determined coherence thresholds (Fig. 1A). Participants  
130 indicated via button press (The Blackbox Toolkit Ltd., UK) whether the random dots moved  
131 up- or downwards in the attended hemifield. Across subjects, individual coherence levels were  
132 defined at  $9.8 \pm 4.2$  % (hard) and  $12.8 \pm 4.2$  % (easy;  $M \pm SD$ ; Fig. 1B) using an adaptive  
133 procedure [56].

134 Overall, 400 trials were presented in 8 blocks during the localizer session, while EEG was  
135 recorded. During each of the four tACS sessions, 712 trials were presented in 16 blocks, while  
136 tACS was applied in an intermittent stimulation protocol (312/712 trials; tACS<sub>ON</sub>) (Fig. 1C). EEG  
137 was recorded during non-tACS sequences (400/712 trials; tACS<sub>OFF</sub>). During all sessions,

138 participants were seated inside a dimly-lit electromagnetically shielded booth in front of a  
139 computer screen. Custom MATLAB scripts (The Mathworks Ltd., USA) using the Psychophysics  
140 Toolbox [57,58] were employed for stimulus presentation.

141

#### 142 **EEG data acquisition**

143 EEG data were digitized at a sampling rate of 5 kHz using a BrainAmp EEG amplifier  
144 system (BrainProducts, Germany) with an analog filter between 0.016 and 250 Hz and the lab  
145 streaming layer (<https://labstreaminglayer.org>). 126 passive Ag/AgCl electrodes were placed  
146 in an equidistant layout (Fig. 2H), with the online-reference placed at the nose tip and a fronto-  
147 polar ground electrode (EasyCap, Germany). Two electrodes were placed below the eyes to  
148 record the electrooculogram (EOG). Electrode impedances were kept below 20 k $\Omega$  and  
149 individual electrode positions were optically registered (Xensor, ANT Neuro, The Netherlands)  
150 for electric field simulations, optimization of tACS montages, and EEG source localization.

151

#### 152 **MRI data acquisition and FEM head model generation**

153 For each subject structural T1 and T2-weighted magnetic resonance images (MRI) were  
154 recorded with a 3T MR-scanner and a 64-channel head coil at an isotropic voxel resolution of  
155 1x1x1 mm (Siemens Magnetom Prisma, Germany). Both, T1 and T2 images were acquired with  
156 an MP-RAGE pulse sequence (T1: TR/TE/TI/FA = 2300 ms/ 2.98 ms/ 1100 ms/ 9°, FoV = 192 x  
157 256 x 256 mm; T2: TR/TE = 3200 ms/ 408 ms, FoV = 192 x 256 x 256 mm).

158 Integrating T1 and T2 imaging data, six compartments were segmented using SPM12-  
159 based segmentation ([www.fil.ion.ucl.ac.uk/spm](http://www.fil.ion.ucl.ac.uk/spm)) and custom image post-processing including  
160 Boolean and morphological operations [44,47,59,60] (see [47] for a detailed description of the  
161 procedure). Finally, for each subject isotropic and geometry-adapted hexahedral FEM head  
162 models were computed and utilized for the simulation of electric fields induced by tACS, as  
163 well as for EEG source localization [42,61]. Individually registered electrode positions from the  
164 EEG layout were simulated in the framework of a point electrode model [62].

165

#### 166 **Personalized tACS: Preparation and application**

167 Stimulation targets were defined within left and right parietal regions of interest (ROI)  
168 at the sites of maximal lateralization of alpha power, based on the EEG localizer data and exact  
169 low-resolution electromagnetic tomography (eLORETA) [63] in combination with individual

170 FEM leadfields (Fig. 2G; see Supplement for a details). Target locations and orientations were  
171 then used to compute personalized tACS montages.

172 The Distributed Constrained Maximum Intensity (DCMI) algorithm was utilized [64,65]  
173 for the individual targeting of tACS montages, based on the individual 126 electrode positions  
174 (Fig. 2H) and the respective six compartment FEM head models with  $3.67 \pm 0.31$  million nodes  
175 (see [47] and Supplement for details). In short, the DCMI maximizes the electric field intensity  
176 along the orientation of the stimulation target (directionality), while including a parameter  
177 that allows to distribute the injected current across stimulation electrodes. In a two-step  
178 procedure the number of stimulation electrodes was fixed to six electrodes. The maximal  
179 current applied to each electrode was limited to 0.95 mA to reduce potential tactile  
180 perception of electrical stimulation.

181 In four sessions, tACS was applied in an intermittent electrical stimulation protocol  
182 either targeting the left or right IPS in the alpha (10 Hz) or gamma frequency (47.1 Hz) [cf.  
183 31,53] (Fig. 1C), resulting in four tACS conditions (alpha-left; gamma-left; alpha-right; gamma-  
184 right). A Starstim device (Neuroelectronics, Spain) and Ag/AgCl stimulation electrodes (NG Pistim)  
185 with a surface of 3.14 cm<sup>2</sup> were utilized for stimulation. During each tACS-session, six EEG  
186 electrodes from the 126-channel layout (Fig. 2H) were replaced by stimulation electrodes of  
187 the personalized tACS-montage (see Supplement). tACS started with 15 min of stimulation  
188 ("warmup"), before eight tACS<sub>OFF</sub> blocks without stimulation (8x 4.5 min) were conducted  
189 interleaved with seven short stimulation blocks (7x 3 min, tACS<sub>ON</sub>). This procedure allowed the  
190 intermittent recording of EEG data free of electrical tACS-artifacts to analyze stimulation  
191 aftereffects during tACS<sub>OFF</sub> intervals. Gamma-tACS at 47.1 Hz was chosen as a control  
192 condition to assess the frequency specificity of tACS effects at a frequency that is not a  
193 multiple of 10 Hz [cf. 31,53]. Further, the application of tACS targeting homologue brain areas  
194 in the left and right parietal cortex allows the assessment of the spatial specificity of tACS  
195 effects [cf. 66,67]. The assessment of the localizer data allows the comparison of the active  
196 stimulation conditions to a no-stimulation condition. Since the occurrence of stimulation side-  
197 effects is commonly highly variable across participants, tACS was applied with either 1.5 or 2  
198 mA zero-to-peak to minimize the occurrence of phosphenes or transcutaneous side-effects  
199 during stimulation. In addition, anesthetic creme (2.5 % lidocaine, 2.5 % prilocaine) was  
200 applied to reduce transcutaneous sensations during electrical stimulation [68].

## 201 **Analysis of electric field simulations**

202 Personalized electric field simulations were computed targeting either the left ( $IPS_L$ ) or  
203 the right IPS ( $IPS_R$ ). Electric field simulations for alpha- and gamma-tACS were equivalent  
204 (quasi-static approximation). To compare electric field simulations between the left and right  
205 hemisphere, the electric field magnitude was estimated for each of five tissue types (SKIN,  
206 BONE, CSF, GRAY, WHITE) by averaging the 10000 nodes with the highest values ( $E_{kmax}$ ) [23]  
207 for electric fields targeting  $IPS_L$  and  $IPS_R$ , respectively. For each target, we computed the  
208 parallelity ( $E_{par}$ ) between the stimulation target orientation vector and the target electric field  
209 orientation vector and the target intensity ( $E_{target}$ ) corrected for the parallelity with the  
210 stimulation target vector (directionality [64]). Similarly, non-target directionality ( $E_{non-target}$ )  
211 was defined contralateral to the stimulation target. Furthermore, the spatial extent of the  
212 electric field relative to the stimulation target ( $E_{extent}$ ) was analyzed [47]. For illustration,  
213 individual electric fields were interpolated on a common MNI cortical grid and averaged across  
214 subjects for  $IPS_L$  and  $IPS_R$ , respectively (Fig. 2A; see Supplement for details).

215  $E_{kmax}$  measures were statistically analyzed in a repeated-measures analysis of variance  
216 (ANOVA) including the factors Stimulation Side [ $IPS_L$ ,  $IPS_R$ ] and Tissue [SKIN, BONE, CSF, GRAY,  
217 WHITE]. Target-specific measures ( $E_{target}$ ,  $E_{par}$ ,  $E_{extent}$ ) were tested with paired t-tests to  
218 evaluate differences between electric field simulations between  $IPS_L$  and  $IPS_R$ .

219

## 220 **Behavioral data analysis**

221 Behavioral data were analyzed with respect to performance differences between trials in  
222 which participants attended the left ( $attend_L$ ) versus the right hemifield ( $attend_R$ ). Median  
223 reaction times (RTs), as well as sensitivity index  $d'$  and response bias  $\ln(\beta)$  were computed [69],  
224 separately for each attention side ( $attend_L$  and  $attend_R$ ), for the  $tACS_{ON}$  and  $tACS_{OFF}$  intervals,  
225 as well as for the first and second half of the experiment. Parameters for the  $tACS_{ON}$  intervals  
226 were computed for the warmup interval ( $ON_1$ ) and integrated across all subsequent  $tACS_{ON}$   
227 blocks ( $ON_2$ ). For  $tACS_{OFF}$  intervals of the first four ( $OFF_1$ ) and last four blocks ( $OFF_2$ ) were  
228 integrated, see Fig. 1C). During the localizer session, only  $OFF_1$  and  $OFF_2$  blocks were computed,  
229 since no tACS was applied. HITS were defined as probabilities of correct UP responses and  
230 false positives (FPs) as probabilities of incorrect DOWN responses (see Supplement for details).  
231 The behavioral lateralization during the localizer session was tested with repeated-measures  
232 ANOVAs including the factors Block [ $OFF_1$ ,  $OFF_2$ ] and Attention Side [ $attend_L$ ,  $attend_R$ ],



233 separately computed for  $d'$ ,  $\ln(\beta)$  and RTs. A similar analysis was conducted to test behavioral  
234 lateralization for the four tACS sessions. Therefore, attention contrasts ( $\text{attend}_L - \text{attend}_R$ )  
235 were computed for each parameter and stimulation condition. For these contrasts, repeated-  
236 measures ANOVAs were computed including the factors Block [ $\text{ON}_1, \text{ON}_2, \text{OFF}_1, \text{OFF}_2$ ],  
237 Stimulation Frequency [ $\alpha, \gamma$ ] and Stimulation Side [ $\text{IPS}_L, \text{IPS}_R$ ], separately for  $d'$ ,  $\ln(\beta)$   
238 and RTs.

239

#### 240 **EEG data analysis**

241 Due to electrical contamination of the EEG signal during tACS application [70,71], only tACS<sub>OFF</sub>  
242 artifact-free EEG data were analyzed (Fig. 1C) for the four tACS sessions ( $\alpha$ -left,  $\alpha_L$ ;  $\gamma$ -  
243 left,  $\gamma_L$ ;  $\alpha$ -right,  $\alpha_R$ ;  $\gamma$ -right,  $\gamma_R$ ). EEG data from the localizer session were analyzed in  
244 a similar way to illustrate EEG activity in the absence of tACS during visuo-spatial attention.  
245 EEG data were analyzed using MATLAB (The Mathworks Ltd., USA) including the EEGLAB [72],  
246 FieldTrip [73] and METH [74] toolboxes, as well as custom scripts.

247

#### 248 ***Preprocessing of EEG data***

249 Continuous EEG data were down-sampled to 500 Hz and highpass-filtered at 0.3 Hz half-  
250 amplitude cutoff (transition bandwidth = 0.6 Hz). The EEG data were epoched to cue and  
251 stimulus onset, respectively (-1 to 1 s), artifactual channels were removed ( $0.3 \pm 1$  channels  
252 rejected,  $M \pm SD$ ) and EEG epochs holding residual tACS or non-stereotyped artifacts were  
253 rejected. A lowpass-filter was applied at 35 Hz to assess low frequency oscillatory brain activity  
254 and ERPs (0.3 - 35 Hz). To control for eye movement, bipolar EOG channels were computed  
255 for horizontal and vertical eye movement. Independent component analysis (ICA) components  
256 related to eye-blinks, electrocardiogram and electrical noise were identified based on  
257 topographies, spectra, temporal dynamics, as well as the relation of each component to the  
258 EOG [75] and the respective ICA weights were set to zero ( $11.8 \pm 4.4$  ICs were rejected,  $M \pm$   
259  $SD$ ). Finally, the data were re-referenced to common average reference and missing channels  
260 were interpolated using a spherical spline.

261

#### 262 ***EEG spectral analyses***

263 Sensor space alpha total power was computed for the cue interval (-0.75 to 0 s relative  
264 to stimulus onset). Power analysis was centered at  $10 \pm 2$  Hz using two Slepian tapers. Results

265 were averaged across electrodes for two posterior electrode clusters of interest in sensor  
266 space (left posterior, lp; right posterior, rp; Fig. 3D). eLORETA was utilized to estimate source  
267 alpha power in the cue interval (-0.75 to 0 s relative to stimulus onset) along the dominant  
268 orientation [76]. A laterality index (LI) was computed as  $\frac{attend_{left} - attend_{right}}{attend_{left} + attend_{right}}$  for every grid  
269 point. For the localizer, a repeated-measures ANOVA was used for the statistical analysis of  
270 sensor-level alpha power including the factors Electrode Cluster [lp, rp] and Attention Side  
271 [attend<sub>L</sub>, attend<sub>R</sub>]. Separately, a repeated-measures ANOVA was computed to test for tACS-  
272 modulations of alpha power including the factors Stimulation Frequency [alpha, gamma],  
273 Stimulation Side [IPS<sub>L</sub>, IPS<sub>R</sub>], Electrode Cluster [lp, rp], and Attention Side [attend<sub>L</sub>, attend<sub>R</sub>]. In  
274 case of significant differences on sensor-level, source-level z-scores (uncorrected) were  
275 computed, contrasting source estimates of attend<sub>L</sub> and attend<sub>R</sub> within each experimental  
276 condition (loc, al, gl, ar, gr).

277 Based on previous literature on visuo-spatial attention [1,2,77], bilateral superior  
278 occipital cortices (sOCC), left and right IPS and bilateral middle occipital cortices (mOCC) were  
279 defined as posterior ROIs along the dorsal attention network [78]. Power was averaged for all  
280 grid points within each region of interest for statistical analysis of source power. To validate  
281 alpha lateralization during the localizer on source-level (especially in IPS), a repeated-  
282 measures ANOVA was computed. For the localizer, ROI [IPS, mOCC, sOCC], Hemisphere [hemi<sub>L</sub>,  
283 hemi<sub>R</sub>], and Attention Side [attend<sub>L</sub>, attend<sub>R</sub>] were defined as factors. Similarly, to assess tACS-  
284 modulation effects on alpha power lateralization, a repeated-measures ANOVA was  
285 computed including ROI [IPS, mOCC, sOCC], Stimulation Frequency [alpha, gamma],  
286 Stimulation Side [IPS<sub>L</sub>, IPS<sub>R</sub>], Hemisphere [hemi<sub>L</sub>, hemi<sub>R</sub>], and Attention Side [attend<sub>L</sub>, attend<sub>R</sub>]  
287 as factors.

288

### 289 **ERP analyses**

290 In addition, visual ERPs were assessed as an indicator of attention-modulated neuronal  
291 activity. Sensor-level ERPs were computed in response to random dot stimuli (-0.2 to 0.75 s,  
292 relative to stimulus onset), separately for attending to the left and right hemifield, as well as  
293 for each stimulation condition. Epochs were averaged and baseline-corrected (-0.2 to 0 s).  
294 Difference ERPs were computed by subtracting ERPs of attend<sub>R</sub> from ERPs of attend<sub>L</sub> (attend<sub>L</sub>  
295 - attend<sub>R</sub>). eLORETA [63] was utilized for source localization of ERPs. eLORETA solutions were  
296 computed for the ERP activity, averaged across the respective time window of interest for the

297 ERPs of the localizer and each stimulation condition and attention side. LI was computed as  
298  $\frac{attend_{left} - attend_{right}}{attend_{left} + attend_{right}}$  for every grid point based on the source estimates of  $attend_L$  and  $attend_R$ .

299 A non-parametric cluster permutation test [79] was conducted to test for differences  
300 between ERPs related to  $attend_L$  and  $attend_R$  during the stimulus interval of the localizer. The  
301 permutation test for the stimulus-related ERPs was applied for the time-window 0 to 0.6 s  
302 relative to stimulus-onset and all 126 EEG sensors (paired  $t$ -tests, 1000 permutations,  $\alpha_{cluster} =$   
303 0.05,  $\alpha = 0.05$ , two-sided). In case of significant results for the localizer ERPs, average mean  
304 amplitudes of sensor ERPs ( $attend_L$  and  $attend_R$ ) across time-points and electrodes of each  
305 cluster (cluster sensors with < 50 time samples and cluster time samples including < 10 sensors  
306 were neglected) were submitted to a paired  $t$ -test to validate subsequent mean amplitude  
307 extraction and parametric testing for tACS conditions. These spatiotemporal clusters were  
308 then used to assess ERP differences across the four tACS-sessions.

309 Mean amplitudes of sensor ERPs ( $attend_L$  and  $attend_R$ ) of all stimulation conditions (al,  
310 gl, ar, gr) were extracted, averaged over time-points and electrodes of each cluster that was  
311 defined by the cluster permutation tests from the localizer session. Mean amplitudes were  
312 then conveyed to a repeated-measures ANOVA, including factors Stimulation Frequency  
313 [alpha, gamma], Stimulation Side [ $IPS_L$ ,  $IPS_R$ ], Spatio-Temporal Cluster [left negative, right  
314 positive] and Attention Side [ $attend_L$ ,  $attend_R$ ]. In case of significant differences on sensor-  
315 level, source-level z-scores (uncorrected) were computed, contrasting sources of  $attend_L$  and  
316  $attend_R$  within each experimental condition (loc, al, gl, ar, gr), as well as  $attend_L$ - $attend_R$   
317 differences between experimental conditions.

318

### 319 **Correlation analysis**

320 Correlations between behavioral modulations and the simulated transcranial electric  
321 field magnitudes were computed to further explore the role of interindividual differences in  
322 the applied electric fields. Individual electric field magnitudes were interpolated to a common  
323 5 mm source grid and correlated to the tACS-modulation of behavior ( $attend_L$ - $attend_R$   $d'$ -  
324 contrast), separately for online effects ( $tACS_{ON}$ ) and after-effects ( $tACS_{OFF}$ ). Non-parametric  
325 cluster permutation tests [79] were conducted to test for significant Spearman correlations  
326 using 1000 permutations ( $\alpha_{cluster} = 0.01$ ,  $\alpha = 0.05$ , two-sided).

## A Electric Field Simulations

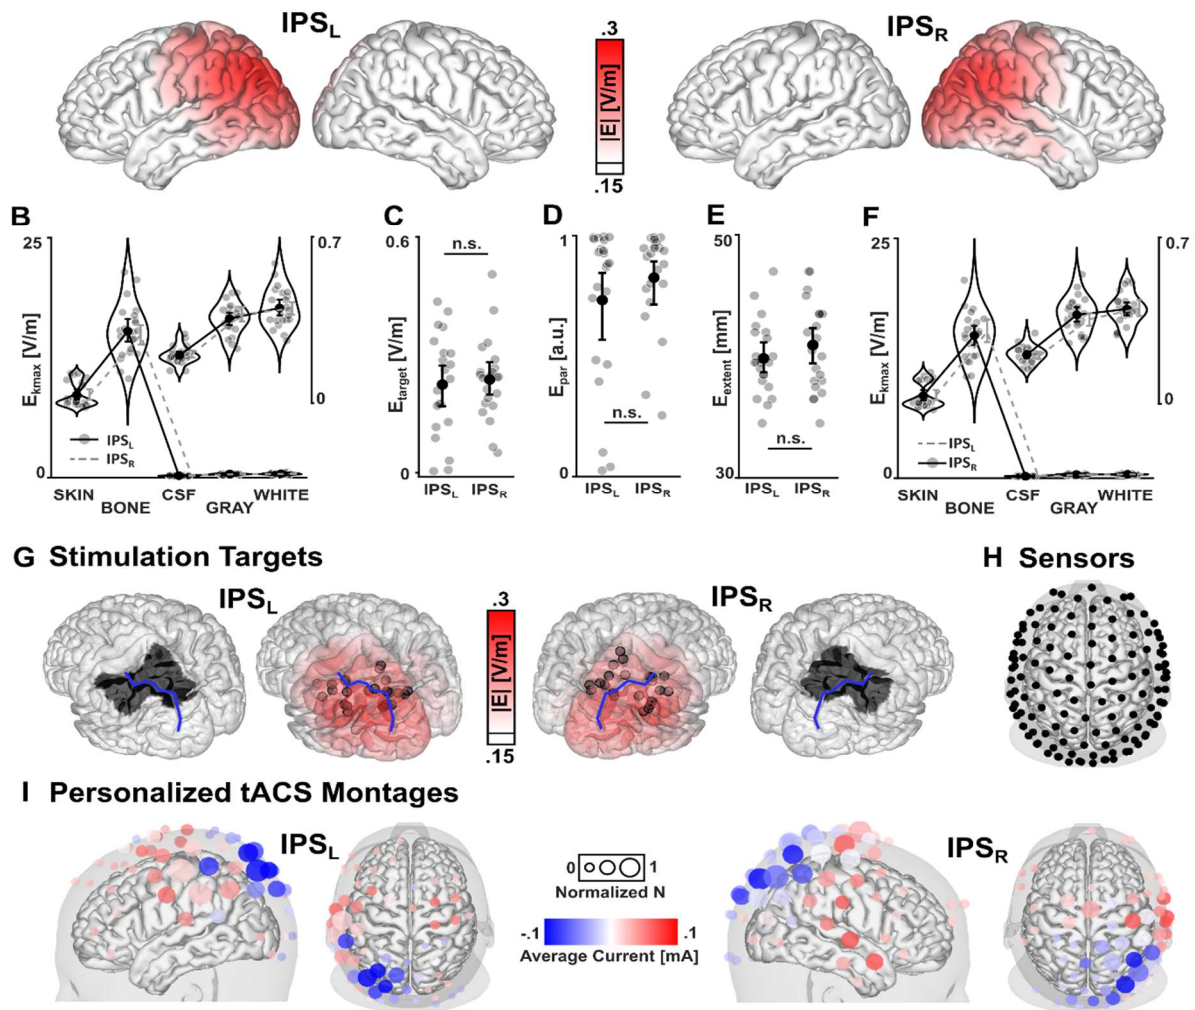

327 **Figure 2. Electric field simulations.** **A)** Average magnitude of electric fields targeting the left (IPSL) and right (IPSR)  
 328 parietal targets (thresholded at 0.15 V/m). **B)** Unspecific electric field magnitude across tissue type for IPSL.  
 329 Dashed grey lines represent the electric field magnitudes for IPSR for direct comparison. Electric field magnitudes  
 330 for cerebrospinal fluid (CSF), gray matter (GRAY), and white matter (WHITE) are amplified, due to the scaling  
 331 differences to SKIN and BONE electric field magnitudes. Electric field magnitudes were similar between IPSL and  
 332 IPSR across all tissue types. **C)** Target electric field magnitude, **D)** parallelity between electric field orientation and  
 333 target orientation in the stimulation target, and **E)** spatial extent of electric fields are comparable between IPSL  
 334 and IPSR. **F)** Unspecific electric field magnitude across tissue type for IPSR. Dashed grey lines represent the electric  
 335 field magnitudes for IPSL for direct comparison. Electric field magnitudes were similar between IPSL and IPSR  
 336 across all tissue types. **G)** Anatomical regions of interest for stimulation target definition (inferior and superior  
 337 parietal cortex), interpolated on the cortical surface (left and right regions of interest are marked by black patches;  
 338 left and right intraparietal sulci are marked by blue lines). The inner two plots depict the individual stimulation  
 339 target coordinates of alpha total power along the intraparietal sulcus (black circles), relative to the average  
 340 electric field magnitude interpolated on the cortical surface of a standard brain. **H)** Electrode positions from the  
 341 EEG layout plotted together with the scalp and cortical surface of a standard brain, viewed from the top. The  
 342 same 126 electrode positions were used for optimization of tACS-montages. **I)** Grand average representation of  
 343 individual tACS-montages. Circle sizes represent the frequency that each electrode was used for stimulation,  
 344 normalized to the number of participants. Color-coding represent the average current applied to each electrode.  
 345 The electrode montage is shown relative to the scalp and cortical surface of a standard brain. n.s. = not significant.  
 346 Individual values and bootstrapped mean and 95%- confidence intervals are depicted in B) to F).

347 For all statistical analyses IBM SPSS Statistics (IBM Corp., USA) and MATLAB (The  
 348 Mathworks Ltd., USA; including FieldTrip) were utilized for statistical analyses. Significance

349 levels were set to  $\alpha = .05$ . For ANOVAs, Greenhouse-Geisser correction was applied in case  
350 the sphericity assumption was violated and follow-up paired  $t$ -tests or Wilcoxon signed-rank  
351 tests (in case of violated normality assumption) were computed for the highest-order  
352 interaction or main effects, respectively. Results from  $t$ -tests were corrected for multiple  
353 comparisons using the Bonferroni-Holm correction [80]. In case of significant results, test-  
354 values, corrected  $p$ -values, as well as effect sizes are reported. For cluster permutation tests,  
355 cluster  $p$ -value (corrected) and the number of spatio-temporal samples in the cluster ( $n_{\text{clustersize}}$ )  
356 are reported for significant effects.

357

## 358 Results

### 359 Electric field simulations targeting the left and right hemisphere show no difference

360 Electric field simulations revealed overall cortical electric field magnitudes of  $E_{\text{kmax}} = 0.37$   
361  $\pm 0.06$  V/m (GRAY,  $M \pm SD$ ) with highest values in posterior brain regions along the left and  
362 right IPS, respectively (Fig. 2A). On average, a reasonable and specific electric field magnitude,  
363 anti-/parallel to the stimulation target orientation was observed for  $\text{IPS}_L$  ( $E_{\text{target}} = 0.22 \pm 0.03$   
364 V/m,  $E_{\text{non-target}} = 0.07 \pm 0.02$  V/m) and  $\text{IPS}_R$  ( $E_{\text{target}} = 0.24 \pm 0.02$  V/m,  $E_{\text{non-target}} = 0.06 \pm 0.01$   
365 V/m,  $M \pm SEM$ ), respectively. The repeated-measures ANOVA of unspecific electric field  
366 magnitudes ( $E_{\text{kmax}}$ ) across Tissue and Stimulation Side showed a significant main effect of  
367 Tissue ( $F_{1,2,24.7} = 733.23$ ,  $p < .0001$ ,  $\eta_p^2 = .972$ ), whereas no main or interaction effect including  
368 Stimulation Side was observed (all  $p > .151$ ). Paired  $t$ -tests confirmed differences in  $E_{\text{kmax}}$   
369 between tissues (BONE > SKIN > WHITE/GRAY > CSF, all  $t_{21} > |17.56|$ , all  $p < 0.001$ , all  $d > 3.75$ ,  
370 except WHITE versus GRAY; Fig. 2B and F, see Supplement). No significant differences were  
371 observed between  $\text{IPS}_L$  and  $\text{IPS}_R$  for neither  $E_{\text{target}}$  ( $p = .645$ ; Fig. 2C),  $E_{\text{par}}$  ( $p = .186$ ; Fig. 2D), nor  
372  $E_{\text{extent}}$  ( $p = .237$ ; Fig. 2E). Overall, these results indicate that no differences were observed  
373 between the applied tACS electric fields targeting  $\text{IPS}_L$  and  $\text{IPS}_R$ . Anatomical target regions and  
374 the pooled stimulation target coordinate vectors relative to the average cortical electric field,  
375 as well as the stimulation montages are depicted for  $\text{IPS}_L$  and  $\text{IPS}_R$  in Fig. 2 (Fig. 2G and 2I; see  
376 Supplement).

377

### 378 **Left alpha-tACS enhances behavioral performance when attending the left hemifield**

379 On average, during the localizer, participants showed hit-rates of  $70 \pm 9\%$  and reaction  
380 times of  $1377 \pm 111$  ms ( $M \pm SD$ ). As intended, no attentional lateralization was observed,  
381 neither of accuracies, response bias, nor reaction times (all interactions and main effects:  $p$   
382  $> .141$ , Fig. 3A).

383 During the four tACS sessions, participants showed average hit-rates of  $76 \pm 2\%$  (al,  $M$   
384  $\pm SD$ ),  $77 \pm 2\%$  (gl),  $78 \pm 2\%$  (ar), and  $76 \pm 2\%$  (gr), as well as average reaction times of  $1408$   
385  $\pm 127$  ms (al),  $1379 \pm 103$  ms (gl),  $1332 \pm 97$  ms (ar), and  $1382 \pm 102$  ms (gr). The repeated-  
386 measures ANOVA of attend<sub>L</sub> - attend<sub>R</sub>  $d'$ -contrasts ( $d'_{al}$ ,  $d'_{gl}$ ,  $d'_{ar}$ ,  $d'_{gr}$ ) revealed a significant  
387 interaction of Stimulation Frequency and Stimulation Side ( $F_{1,21} = 9.51$ ,  $p = .006$ ,  $\eta_p^2 = .312$ ), as  
388 well as a main effect of Stimulation Frequency ( $F_{1,21} = 4.44$ ,  $p = .047$ ,  $\eta_p^2 = .174$ ; all other main  
389 or interaction effects:  $p > .074$ ). Paired  $t$ -tests confirmed a significant difference between left  
390 alpha-tACS and left gamma-tACS (contrast  $d'_{al} > d'_{gl}$ :  $t_{21} = 4.26$ ,  $p = .0014$ ,  $d = .909$ ; Fig. 3B),  
391 indicating relatively higher accuracies for left alpha-tACS, when attending to the left hemifield,  
392 compared to the right hemifield (al: attend<sub>L</sub>  $d' = 1.79 \pm 0.16$ , attend<sub>R</sub>  $d' = 1.72 \pm 0.16$ ;  $M \pm$   
393 SEM) and vice versa for left gamma-tACS (gl: attend<sub>L</sub>  $d' = 1.68 \pm 0.18$ , attend<sub>R</sub>  $d' = 1.88 \pm 0.19$ ).  
394 No significant differences were observed comparing  $d'$  values for any other combination of  
395 stimulation conditions (all  $p > .135$ ). Importantly, the non-significant contribution of the factor  
396 Block indicates that the behavioral effect observed during tACS<sub>ON</sub> also translated to tACS<sub>OFF</sub>  
397 intervals, although the difference between al and gl decreased descriptively during tACS<sub>OFF</sub>  
398 (Fig. 3C). Apart from tACS effects on  $d'$ -contrasts, no significant effects were observed for  
399 response bias (all main effects and interactions:  $p > .066$ ). For reaction times, a significant  
400 Stimulation Frequency \* Block interaction ( $F_{2.5,49.2} = 3.37$ ,  $p = .034$ ,  $\eta_p^2 = .144$ ; all other main  
401 effects and interactions:  $p > .098$ ) was observed. However, follow-up  $t$ -tests of reaction times  
402 averaged across stimulation frequencies did not reveal significant differences (all  $p > .37$ ).

403

### 404 **No tACS-modulation of cue-related alpha lateralization in EEG after-effects**

405 Sensor-level analysis of cue-related alpha total power during the localizer revealed a  
406 significant interaction of Electrode Cluster and Attention Side ( $F_{1,21} = 7.38$ ,  $p = .013$ ,  $\eta_p^2 = .26$ ),  
407 as well as a main effect of Electrode Cluster ( $F_{1,21} = 9.38$ ,  $p = .006$ ,  $\eta_p^2 = .309$ ), but no main  
408 effect of Attention Side ( $p > .356$ ). Paired  $t$ -tests revealed a significant alpha power difference  
409 between attend<sub>L</sub> and attend<sub>R</sub> in the left ( $t_{21} = 2.91$ ,  $p = .017$ ,  $d = .62$ ), but not the right posterior

410 electrode cluster ( $p = .128$ ). In addition, a significantly different LI (contrasting attend<sub>L</sub> and  
 411 attend<sub>R</sub>) was observed between the two electrode clusters ( $t_{21} = 3.83$ ,  $p = .001$ ,  $d = .816$ ; Fig.  
 412 3D, left), indicating enhanced alpha power in left posterior electrodes during attend<sub>L</sub>,  
 413 compared to attend<sub>R</sub> and the opposite pattern in right posterior electrodes.

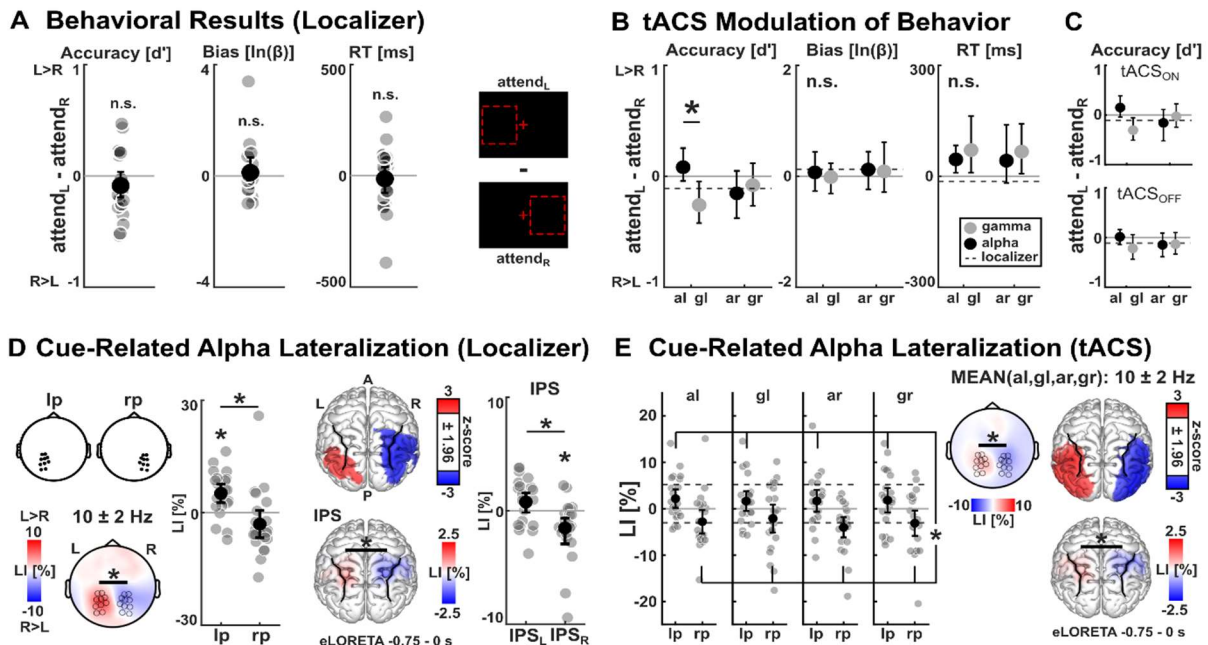

414 **Figure 3. Attentional lateralization of behavior and EEG alpha power. A)** Left: No differences of accuracies,  
 415 response bias, or reaction times between attend<sub>L</sub> and attend<sub>R</sub> were observed during the localizer session.  
 416 Individual values (attend<sub>L</sub>-attend<sub>R</sub>) and bootstrapped mean ± 95%-confidence interval are depicted. Right:  
 417 Illustration of the hypothesized shift of attention in the attend<sub>L</sub> and attend<sub>R</sub> conditions during the cue-stimulus  
 418 interval (see Fig. 1A). **B)** A significant difference was observed between left alpha-tACS (al) and left gamma-tACS  
 419 (gl) on attend<sub>L</sub>-attend<sub>R</sub> accuracy differences. No such difference was observed for right alpha-tACS (ar) or right  
 420 gamma-tACS (gr). Mean values of the localizer session are indicated by dashed black lines for comparisons. **C)**  
 421 Descriptive accuracy contrasts are shown separately for tACS<sub>ON</sub> and tACS<sub>OFF</sub> intervals. **D)** Left: Cue-related alpha  
 422 total power lateralization contrasting attend<sub>L</sub> and attend<sub>R</sub> for the left posterior (lp) and right posterior (rp)  
 423 electrode cluster and its topographical representation. Positive LI-values (LI = lateralization index) indicate higher  
 424 alpha power for attend<sub>L</sub> and negative LI-values indicate higher alpha power for attend<sub>R</sub>. Individual values and  
 425 bootstrapped mean and 95%- confidence intervals are depicted. Right: Source estimation of the same alpha  
 426 lateralization (attend<sub>L</sub> vs. attend<sub>R</sub>) projects to left and right parieto-occipital brain areas along the intraparietal  
 427 sulcus (z-values thresholded at ± 1.96; positive values indicate higher alpha power for attend<sub>L</sub>). Alpha power  
 428 lateralization was confirmed for the parietal regions of interest. Individual LI-values and bootstrapped mean ±  
 429 95%-confidence interval are depicted. **E)** Cue-related alpha total power, averaged in the left posterior (lp)  
 430 and right posterior (rp) electrode cluster for the tACS conditions. The alpha lateralization observed during the  
 431 localizer shown in D) was replicated during the four tACS sessions, yet no tACS-modulation of alpha power  
 432 lateralization was observed. Mean values of the localizer session are represented by dashed black lines for  
 433 comparisons. Topographical representations and source estimates averaged across all four tACS-conditions.  
 434 Individual LI-values and bootstrapped mean ± 95%-confidence interval are depicted, respectively. \* represent  $p$   
 435 < 0.05 corrected for multiple comparisons.

436 The sources of lateralized alpha power during the localizer cue interval span along the  
 437 ventral IPS in the left hemisphere and the ventral and posterior IPS in the right hemisphere  
 438 (Fig. 3D, right). The repeated-measures ANOVA, probing a lateralization of cue-related alpha  
 439 power on source-level, revealed a ROI \* Hemisphere \* Attention Side interaction ( $F_{1.5,32.1} =$

440 6.73,  $p = .007$ ,  $\eta_p^2 = .243$ ), and a Hemisphere \* Attention Side interaction ( $F_{1,21} = 9.5$ ,  $p = .006$ ,  
441  $\eta_p^2 = .312$ ; all other main or interaction effect:  $p > .06$ ). Post-hoc Wilcoxon signed-rank tests  
442 revealed significant differences between alpha source power between attend<sub>L</sub> and attend<sub>R</sub> in  
443 right IPS, right sOCC, and bilateral mOCC (Fig. 3D; see Supplement). LIs were different between  
444 hemispheres for all three ROIs (all  $t_{21} > 3.61$ , all  $p < .002$ , all  $d > .77$ ) and no differences were  
445 observed between ROIs within each hemisphere (all  $p > .064$ ).

446 For the tACS conditions, no modulation of cue-related alpha power was observed,  
447 neither on sensor-level nor on source-level. However, the repeated-measures ANOVA  
448 reproduced the significant interaction of Electrode Cluster and Attention Side ( $F_{1,21} = 9.45$ ,  $p$   
449  $= .006$ ,  $\eta_p^2 = .31$ ), as well as a main effect of Electrode Cluster ( $F_{1,21} = 7.48$ ,  $p = .012$ ,  $\eta_p^2 = .263$ )  
450 that was already observed during the localizer. No specific tACS-effect was observed (all other  
451 main or interaction effects:  $p > .052$ ). Paired  $t$ -tests confirmed a significant alpha power  
452 difference between attend<sub>L</sub> and attend<sub>R</sub> (averaged across all stimulation conditions) in the left  
453 electrode cluster ( $t_{21} = 2.55$ ,  $p = .019$ ,  $d = .543$ ), but also revealed significant power differences  
454 in the right posterior electrode cluster ( $t_{21} = -2.94$ ,  $p = .016$ ,  $d = .626$ ). The LI was significantly  
455 different between the two electrode clusters ( $t_{21} = 3.7$ ,  $p = .001$ ,  $d = .789$ ), indicating a  
456 relatively increased alpha power in left posterior electrodes when attend<sub>L</sub> was compared to  
457 attend<sub>R</sub> and the opposite pattern in right posterior electrodes (Fig. 3E).

458 Averaged across all four stimulation conditions (al, gl, ar, gr), the sources of lateralized  
459 alpha power during the cue interval extended from ventral IPS to posterior IPS in the left  
460 hemisphere relative to the localizer. Source power was localized to ventral, as well as posterior  
461 IPS in the right hemisphere, as illustrated by source-level  $z$ -scores (Fig. 3E). The repeated-  
462 measures ANOVA, probing tACS-modulation of cue-related alpha lateralization on source-  
463 level, revealed a ROI \* Hemisphere \* Attention Side interaction ( $F_{1.2,25.5} = 4.15$ ,  $p = .045$ ,  $\eta_p^2$   
464  $= .165$ ), and a Hemisphere \* Attention Side interaction ( $F_{1,21} = 12.41$ ,  $p = .002$ ,  $\eta_p^2 = .372$ ), a  
465 Stimulation Side \* Hemisphere interaction ( $F_{1,21} = 5.3$ ,  $p = .032$ ,  $\eta_p^2 = .202$ ), as well as main  
466 effects of Stimulation Side ( $F_{1,21} = 4.39$ ,  $p = .048$ ,  $\eta_p^2 = .173$ ) and ROI ( $F_{1.5,31.5} = 3.7$ ,  $p = .048$ ,  $\eta_p^2$   
467  $= .15$ ; all other main or interaction effect:  $p > .079$ ). Post-hoc paired Wilcoxon signed-rank  
468 tests revealed significant differences between alpha source power between attend<sub>L</sub> and  
469 attend<sub>R</sub> (averaged across all stimulation conditions) in bilateral IPS, bilateral sOCC, and  
470 bilateral mOCC (Fig. 3E, see Supplement). LIs were different between hemispheres for all three  
471 ROIs (all  $t_{21} > 6.2$ , all  $p < .001$ , all  $d > 1.321$ ). Left mOCC showed an increased LI, compared to



472 left IPS ( $t_{21} = -3.2, p = .026, d = .681$ ) and the right mOCC showed a stronger lateralization,  
 473 compared to right sOCC ( $t_{21} = 2.87, p = .046, d = .612$ ).

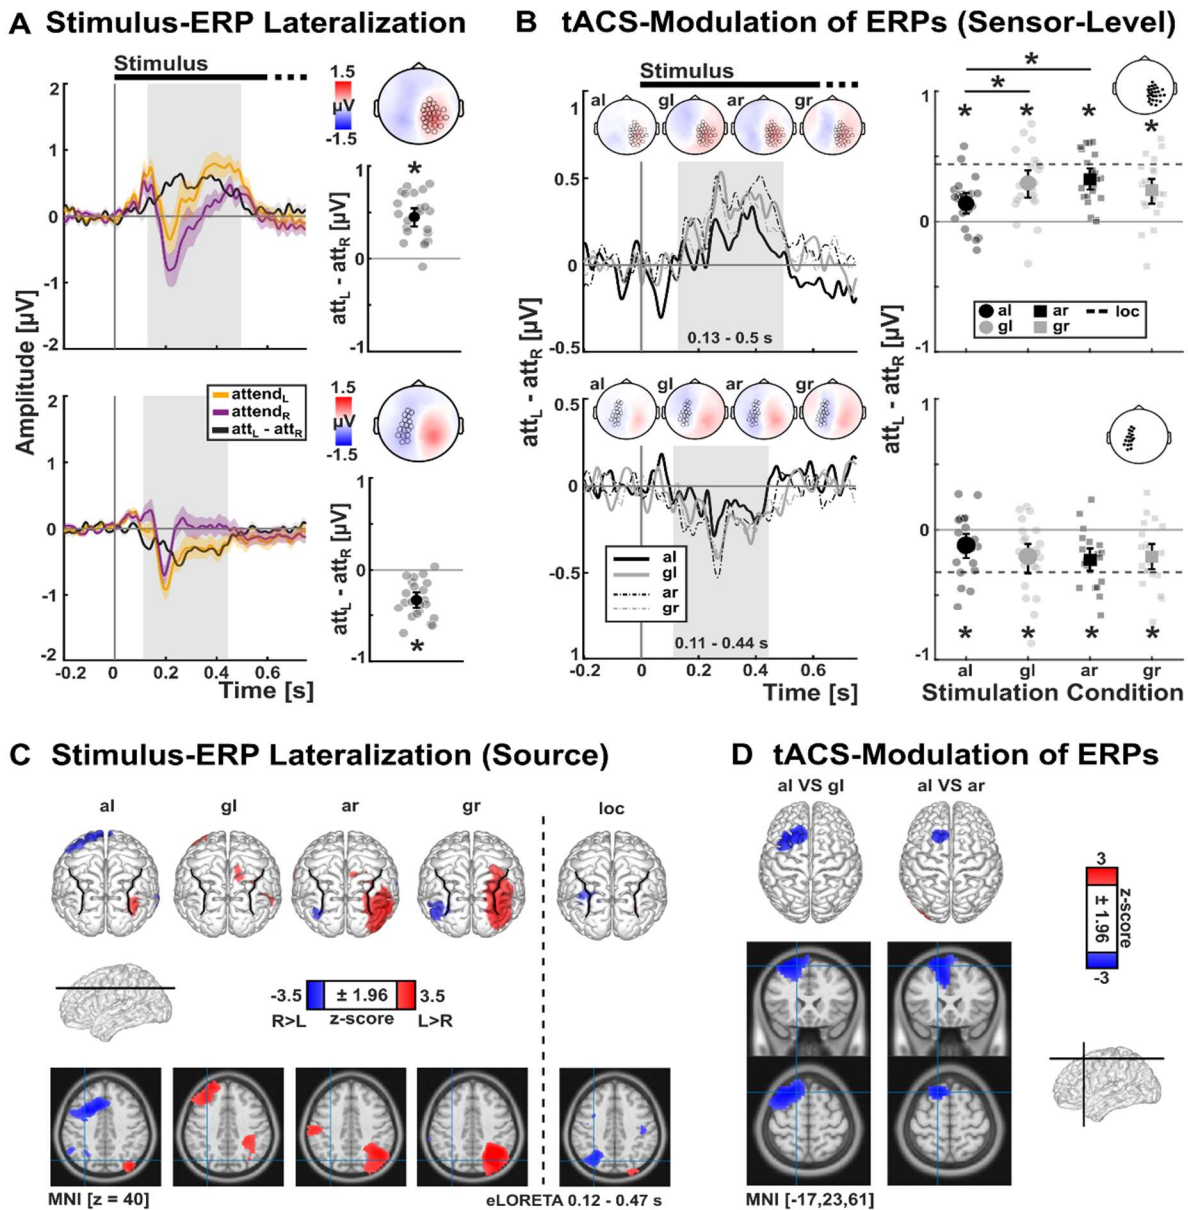

474 **Figure 4. Stimulus-ERP lateralization is modulated by tACS.** **A)** During the localizer session, significant stimulus-  
 475 related amplitude differences between  $att_{L}$  and  $att_{R}$  were identified in a right posterior (top) and a left  
 476 central-posterior electrode cluster (bottom). Visual ERPs (shading indicates mean  $\pm$  standard error of the mean),  
 477 difference ERPs, topographical representations and mean as well as individual ERP amplitudes for the two  
 478 clusters are presented. Individual amplitude values (grey dots) and bootstrapped mean  $\pm$  95%-confidence  
 479 intervals (black dot and error bars) are depicted. **B)** Left: Difference ERPs ( $att_{L}-att_{R}$ ) are shown for the four  
 480 tACS-conditions (alpha-left, al; gamma-left, gl; alpha-right, ar; gamma-right, gr) for the two electrode clusters  
 481 that were defined during the localizer shown in A). Right: Difference ERP-amplitudes for the right posterior  
 482 cluster revealed a significant difference between al and gl, as well as al and ar, indicating a relatively reduced ERP  
 483 lateralization by left alpha tACS. In addition, for all tACS conditions and both clusters, the ERP amplitude  
 484 differences between  $att_{L}$  vs.  $att_{R}$  were statistically significant. Individual values ( $att_{L}-att_{R}$ ) and  
 485 bootstrapped mean  $\pm$  95%-confidence intervals are depicted. **C)** Source representations of  $att_{L}-att_{R}$   
 486 difference ERPs for all four tACS conditions and the localizer. **D)** Source representations of the significant  
 487 contrasts between difference ERPs shown in B) show ERP difference contrasts in left premotor cortex when  
 488 comparing al with gl, as well as al and ar. \* represent  $p < 0.05$ , corrected for multiple comparisons.

## 489 **Left alpha tACS modulates visual ERP activity in left premotor cortex**

490 During the localizer, attention-related amplitude modulations ( $\text{attend}_L$ ,  $\text{attend}_R$ ) were  
491 observed in bilateral posterior electrode clusters (lp, rp) for the visual ERPs (Fig. 4A). Visual  
492 ERPs strongly varied between attention conditions with more positive amplitudes for  
493 attended stimuli in the hemifield contralateral to the respective electrode cluster. Comparing  
494  $\text{attend}_L$  with  $\text{attend}_R$ , we observed a significant positive effect ( $p = .001$ ) in a right posterior  
495 electrode cluster ( $n_{\text{clustersize}} = 4839$ , 126 to 498 ms; Fig. 4A, top) and a significant negative effect  
496 ( $p = .001$ ) in a left centro-posterior electrode cluster ( $n_{\text{clustersize}} = 4418$ , 106 to 450 ms; Fig. 4A,  
497 bottom) revealed by cluster permutation tests. Thus, stimulus ERPs were increased in  
498 amplitude over the hemisphere contralateral to the attended hemifield.

499 Sensor-level ERPs of all tACS sessions (al, gl, ar, gr) for  $\text{attend}_L$  and  $\text{attend}_R$  conditions  
500 were analyzed in the left and right spatio-temporal clusters defined by cluster permutation  
501 statistics of the localizer (Fig. 4A). Statistical analysis of stimulus ERPs revealed a significant  
502 interaction effect of Stimulation Frequency, Stimulation Side, Spatio-Temporal Cluster and  
503 Attention Side ( $F_{1,21} = 10$   $p = .005$ ,  $\eta_p^2 = .322$ ), an interaction of Spatio-Temporal Cluster with  
504 Attention Side ( $F_{1,21} = 52.44$   $p < .001$ ,  $\eta_p^2 = .714$ ) and a main effect of Spatio-Temporal Cluster  
505 ( $F_{1,21} = 8.41$ ,  $p < .009$ ,  $\eta_p^2 = .286$ ; all other  $p > .09$ ). Post-hoc  $t$ -tests confirmed significant  
506 differences between  $\text{attend}_L$  and  $\text{attend}_R$  for all stimulation conditions in both spatio-temporal  
507 clusters (all  $|t_{21}| > 2.43$ , all  $p > .024$ , all  $d > .518$ ; Fig. 4), indicating increased amplitudes in  
508 response to stimuli in the contralateral hemifield for all stimulation conditions (Fig. 4B).  
509 Descriptively, the difference ERPs spanned the whole latency range of visual P1, N1, P2 and  
510 P3 ERP components (see Supplement), peaking between 250-400 ms after stimulus-onset (Fig.  
511 4B).

512 To assess tACS-effects on sensor-level ERPs, follow-up paired  $t$ -tests were conducted  
513 separately for the left and right hemisphere clusters to directly compare  $\text{attend}_L$  -  $\text{attend}_R$   
514 difference ERPs between stimulation conditions. Interestingly, in the right posterior cluster  
515 significant differences were revealed between al and gl ( $t_{21} = -2.86$ ,  $p = .047$ ,  $d = .609$ ), as well  
516 as between al and ar ( $t_{21} = -5.16$ ,  $p = .0002$ ,  $d = 1.1$ ; Fig. 4B, top). No differences were observed  
517 for the other comparisons of difference ERPs between tACS conditions in the right cluster (all  
518  $p > .357$ ), or for any comparison in the left cluster (all  $p > .237$ ; Fig. 4B, bottom).

519 Sources of ERPs were estimated for  $\text{attend}_L$ - $\text{attend}_R$  differences across stimulation  
520 conditions (0.12 to 0.47s relative to stimulus onset), projecting to left and right posterior

521 cortices in all conditions, and to left frontal cortex in conditions al and gl (Fig. 4C). The sources  
 522 of the ERP differences between al and gl were estimated in the left premotor cortex,  
 523 specifically extending from left dorsolateral cortex and medial parts of the superior frontal  
 524 cortex to posterior parts of the middle frontal gyrus and left supplementary motor area (Fig.  
 525 4D). Sources of the difference between al and ar were estimated in left premotor cortex, as  
 526 well as left middle and inferior occipital cortex, including posterior parts of the middle  
 527 temporal gyrus (Fig. 4D, cf. Fig. 4C).

528 **Figure 5. Correlations**  
 529 **between accuracies and**  
 530 **electric field magnitudes.**

531 **A)** Spearman correlations  
 532 were computed between  
 533 the behavioral  $d'$   
 534 contrasts (attend<sub>L</sub>-  
 535 attend<sub>R</sub>) and the whole-  
 536 brain representation of  
 537 individual electric fields  
 538 that target the left  
 539 parietal cortex (IPSL),  
 540 separately for the left  
 541 alpha-tACS (al) and left  
 542 gamma-tACS (gl)  
 543 conditions and separately  
 544 for tACS<sub>OFF</sub> (left) and  
 545 tACS<sub>ON</sub> intervals (right).  
 546 Spearman  $\rho$  values are  
 547 shown, interpolated on  
 548 the cortical surface of the MNI brain. Cluster permutation statistics revealed a negative correlation only for the left alpha-tACS condition during tACS<sub>OFF</sub> intervals (most left). **B)** A significant negative correlation between the electric field magnitude and the  $d'$  contrast during tACS<sub>OFF</sub> was induced by left parietal alpha-tACS, based on a cluster in left premotor cortex. Spearman  $\rho$  values within the cluster are interpolated on the cortical surface of the MNI brain (left) and in horizontal slices (right). For illustrative reasons, absolute  $\rho$  values below 0.5 are not shown. Two major foci of the cluster can be identified in left dorsomedial premotor cortex (supplementary motor area) and in left lateral premotor cortex. \* represent  $p < 0.05$ , corrected for multiple comparisons.

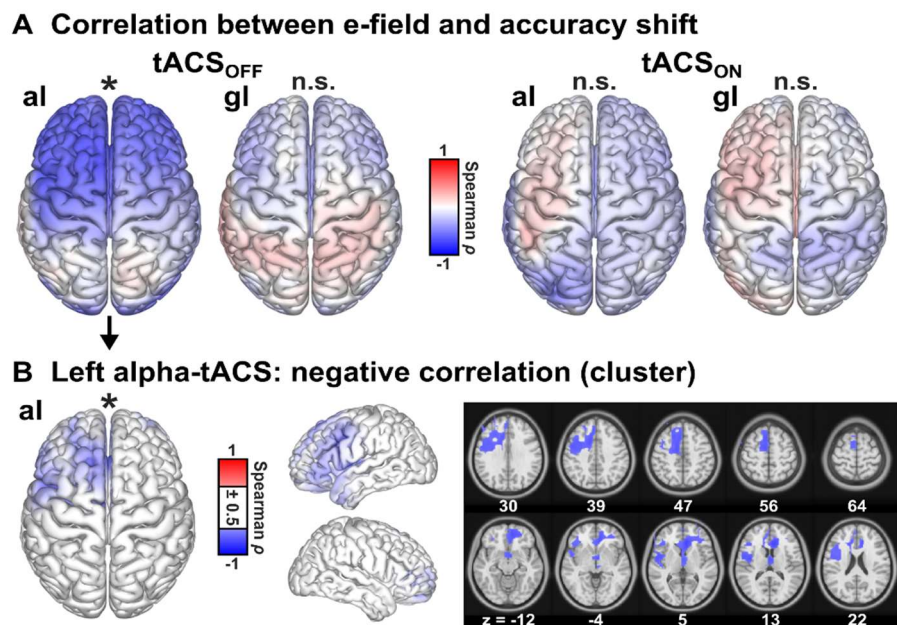

555 **Electric field magnitude in left premotor cortex correlates with behavior during left alpha-**  
 556 **tACS**

557 In this study, tACS targeting the left parietal cortex (IPSL) yielded significant differences  
 558 of behavioral accuracies between left alpha and left gamma stimulation. In addition, tACS was  
 559 shown to affect stimulus-evoked neuronal activity in left premotor cortex. Importantly, based  
 560 on these findings, electric field magnitudes in a cluster in left premotor cortex and adjacent  
 561 regions were shown to be negatively correlated with behavioral  $d'$  contrasts after left alpha-  
 562 tACS ( $p = .001$ ,  $n_{\text{clustersize}} = 2695$ ; Fig. 5). Accordingly, if the electric field during left alpha-tACS  
 563 was higher in left premotor cortex, participants show relatively decreased accuracies for

564 stimuli attended in the left hemifield (i.e., an attention shift to the right hemifield). No  
565 significant correlations were observed between the electric field and  $d'$  contrasts estimated  
566 during tACS<sub>ON</sub>, or  $d'$  contrasts in the left gamma-tACS condition.

567

## 568 **Discussion**

569 Personalized alpha-tACS and gamma-tACS were applied to the left and right posterior  
570 parietal cortex during a visuo-spatial attention paradigm using an intermittent stimulation  
571 protocol. This procedure allowed the assessment of behavioral tACS modulations, individual  
572 electric field simulations, as well as tACS after-effects in the EEG. We showed that personalized  
573 alpha-tACS targeted to the left parietal cortex increased accuracies when participants  
574 attended the left hemifield relative to the right hemifield, when compared to left gamma-tACS.  
575 This behavioral effect was accompanied by a significantly reduced ERP amplitude  
576 lateralization in right posterior sensors during left parietal alpha-tACS, compared to left  
577 parietal gamma-tACS and right parietal alpha-tACS. EEG source reconstruction located this  
578 ERP effect in left premotor cortex. Interestingly, the attentional shift induced by left parietal  
579 alpha tACS was dependent on electric field magnitudes in the left premotor cortex.

580

### 581 **Left parietal alpha- versus gamma-tACS induces an attentional shift to the left hemifield**

582 Assuming that neuronal alpha power in the posterior parietal cortex [1,2] can be  
583 modulated by tACS, our behavioral finding of a discrimination performance shift to the left  
584 hemifield by left alpha tACS compared to left gamma-tACS (Fig. 3B) is in line with previous  
585 studies showing that alpha-tACS over the left parieto-occipital cortex facilitates attentional  
586 shifts to the ipsilateral hemifield during covert visuo-spatial attention [30,31,33]. Specifically,  
587 during covert attention, alpha-tACS over the left parieto-occipital cortex induced faster  
588 reaction times in simple discrimination tasks, when attending the left hemifield, relative to  
589 the right hemifield [30,31]. No tACS-modulation of RTs was observed during exogenous  
590 attention [30,31], or with tACS over right parieto-occipital cortex [31]. Interestingly, the  
591 observed shift of accuracies ( $d'$ ) in our data indicates that neuronal alpha activity can not only  
592 be associated with the disengagement and re-allocation of attention in invalidly cued trials  
593 [31], but also affects the local perceptual processing in the attended hemifield for valid trials.  
594 Moreover, the observed dichotomy of alpha versus gamma tACS in our study has been

595 described previously during visuo-spatial [31] and auditory-spatial attention [53] and can be  
596 related to antagonistic effects of neuronal activity in the alpha- and gamma-band [52,81–86].

597 Here, we substantiate previous findings of non-personalized tACS over parietal cortex  
598 by evaluating individual tACS-induced electric fields that explicitly target the left and right  
599 parietal cortices. Importantly, the central finding that behavioral tACS-modulations could only  
600 be observed after left, but not right, alpha- versus gamma-tACS cannot be explained by  
601 differences in applied electric fields (Fig. 3B). Electric fields targeting the left or right parietal  
602 cortex were comparable with respect to magnitudes across tissues (Fig. 2A, B and F) and in  
603 the stimulation targets (Fig. 2C), the parallelity between the electric field orientations and the  
604 stimulation target orientations (Fig. 2D), and the spatial extent of electric fields (Fig. 2E).  
605 Interestingly, in a recent MEG-neurofeedback study specifically focusing on the endogenous  
606 modulation of visuo-spatial attention, data showed that attention-related alpha lateralization  
607 was primarily driven by a modulation of left rather than right posterior alpha activity [87]. This  
608 finding was supported by tACS applications that showed specific modulation of endogenous  
609 visuo-spatial attention by posterior alpha-tACS over left [30,31,33], but not right hemisphere  
610 [31]. Although some studies reported a shift of attention to the right hemifield by tACS over  
611 the right parietal cortex [34,35], these results showed limited replicability [34,36,37]. Taken  
612 together, our presented data might indicate an increased susceptibility of the left dorsal  
613 attention network to subtle tACS-induced neuromodulation during visuo-spatial attention.

614

#### 615 **No evidence for outlasting tACS-modulations of cue-related alpha power**

616 During both the localizer experiment and across all four tACS sessions, we observed a  
617 pronounced lateralization of alpha oscillatory activity (Fig. 3D and 3E), substantiating previous  
618 studies that showed a relative increase of alpha power ipsilateral to the attended hemifield  
619 [4,5,7–12] along the intraparietal sulcus [1–3,50] (Fig. 3D and 3E). However, we did not  
620 observe the hypothesized modulation of posterior alpha power after-effects by the  
621 application of personalized alpha-tACS targeting the left and right parietal cortex, neither at  
622 sensor-level (Fig. 3E), nor source-level (Fig. 3E, see Supplement). It is important to note that  
623 the analysis of concurrent electrophysiological effects was precluded by strong electrical  
624 artifacts during tACS. Therefore, data analysis relied on outlasting effects of stimulation in the  
625 tACS<sub>OFF</sub> intervals. However, after-effects of tACS are associated to lasting neuroplastic changes  
626 [25,28] and may differ from entrainment-related online effects [88] that decay quickly after

627 the end of stimulation [89,90]. Thus, although alpha power after-effects were not observed in  
628 the present study, this does not preclude an effective online entrainment of alpha rhythms  
629 that can have given rise to behavioral modulations. In support of this assumption the  
630 behavioral effects were descriptively reduced for tACS<sub>OFF</sub> compared to tACS<sub>ON</sub> intervals (Fig.  
631 3B) and may suggest a limited transfer of online tACS-modulation of neuronal alpha power to  
632 offline intervals.

633

#### 634 **Left alpha-tACS modulates ERP-amplitude lateralization in left premotor cortex**

635 During the assessment of stimulus ERPs, a lateralization of amplitudes was revealed in  
636 left and right posterior electrodes that was modulated by left alpha-tACS (Fig. 4). Specifically,  
637 the difference stimulus ERPs showed a posterior positivity with a left posterior inversion and  
638 a clear peak in the latency range of the P3b ERP component [91], indicating larger amplitudes  
639 in the posterior electrodes over the hemisphere contralateral to the attended hemifield (Fig.  
640 4A and 4B). An increase in the posterior P3b amplitude has been proposed to reflect the  
641 allocation of top-down attentional resources towards relevant stimuli [92–94], thereby  
642 facilitating behavior. In line with our results, visuo-spatial ERP components have been  
643 repeatedly shown to increase over posterior scalp regions contralateral to the attended  
644 hemifield, indicating the facilitated processing of attended stimuli [17–19]. Critically however,  
645 in the present study, the difference ERP amplitudes were reduced during left alpha-tACS (Fig.  
646 4B), while an increased lateralization of accuracies to the left hemifield was observed during  
647 the same condition (Fig. 3B). Thus, the ERP amplitudes during left alpha-tACS do not seem to  
648 indicate an additional allocation of attentional resources related to the P3b, since that would  
649 have been marked by an increased amplitude lateralization. Importantly, P3b sources would  
650 be expected in posterior brain regions [94]. In contrast, in our study, eLORETA sources of the  
651 ERP amplitude variations and the difference between left alpha- and gamma-tACS were  
652 estimated in left premotor cortex for the left alpha-tACS condition (Fig. 4C-D), covering a  
653 similar area as described in previous fMRI experiments on visuo-spatial attention [3,95,96].  
654 ERP amplitudes in premotor cortex were relatively decreased when attending to the  
655 (ipsilateral) left hemifield during left parietal alpha-tACS (Fig. 4C). The observed ERP  
656 modulation in premotor cortex includes the supplementary motor area, which is associated  
657 with the preparation of self-initiated movements [97,98] and, more importantly, the  
658 preparation of eye movements towards a cued location [96,99,100], tightly linking networks

659 of visuo-spatial attention to oculomotor function [96,101–104]. Furthermore, premotor  
660 cortex has been proposed to be tightly coupled with parietal and occipital brain regions during  
661 visuo-spatial attention [3,105,106]. In the present study, the attentional shift to the left  
662 hemifield induced by left alpha-tACS was accompanied by decreased stimulus ERP amplitudes  
663 in the left premotor cortex when attending the left hemifield relative to the right hemifield  
664 (left gamma-tACS induced the opposite effects; Fig. 3B and 4C). A similar shift of attention  
665 towards the left hemifield has been described when the left premotor cortex was inhibited by  
666 repetitive transcranial magnetic stimulation [3]. Since, in the present study, posterior parietal  
667 cortex was specifically targeted by tACS, we assume that left alpha-tACS versus gamma-tACS  
668 could have modulated the left fronto-parietal network and, thus, stimulus ERP amplitudes in  
669 frontal areas. Specifically, our results indicate that tACS might have affected parietal control  
670 over premotor areas [cf. 51] or connectivity in the fronto-parietal network [3,35,36,50,107]  
671 which gave rise to behavioral attention effects.

672

### 673 **Electric field magnitudes in left premotor cortex are related to behavioral lateralization**

674 Interestingly, we observed a correlation between the electric field magnitude in the left  
675 premotor cortex (showing an ERP amplitude modulation by tACS) and the behavioral shift of  
676 attention (indexed by  $d'$ ) during the tACS<sub>OFF</sub> interval after left parietal alpha-tACS (Fig. 5).  
677 These results indicate a potential co-stimulation of left premotor cortex when targeting the  
678 IPS<sub>L</sub>. Specifically, higher electric field magnitudes in the left premotor cortex were associated  
679 with a relative facilitation of accuracies ( $d'$ ) in the right hemifield. Thus, this co-stimulation of  
680 left premotor cortex counteracted the attentional shift to the left hemifield. These results  
681 indicate that the co-stimulation of left premotor and left parietal cortex affected the  
682 connectivity in the fronto-parietal network [3,35,36,50,107] differently compared to the  
683 predominantly parietal stimulation.

684 Co-stimulation of brain regions apart from the tACS target region are inevitable when  
685 optimizing electric fields with regard to target intensity. As electrode placement is not  
686 restricted with respect to their spatial extent [41,47,108], non-focal stimulation montages  
687 might enforce a co-stimulation of various cortical regions [47,109]. In some participants of the  
688 present study, the personalization of the tACS montage led to the placement of one set of  
689 electrodes over parietal cortex with another set of electrodes of inverted polarity roughly over  
690 premotor cortex of the same hemisphere (see Supplement), leading to a co-stimulation of

691 parietal and premotor cortex. Further, previous studies showed that the efficacy of tACS-  
692 neuromodulation depends on the intrinsic state of the brain network being involved in the  
693 task [90,110,111, see also 112,113]. During covert visuo-spatial attention, the left hemisphere,  
694 including the parietal and the premotor cortex, are involved in the modulation of perception  
695 and cognition [30,31,87,105,114]. Thus, in line with our results, the same regions might be  
696 highly susceptible to subtle neuromodulations, such as low-amplitude tACS.

697

## 698 **Conclusion**

699 In this study, we applied personalized alpha- and gamma-tACS specifically targeting the  
700 left and right posterior parietal cortex during covert visuo-spatial attention. We found that left  
701 parietal alpha-tACS shifted attention to the left hemifield ipsilateral to electrical stimulation  
702 compared to left gamma-tACS. Since no asymmetry was observed for the simulated electric  
703 fields between the left and right hemisphere, this lateralization of attention highly supports a  
704 tACS-induced modulation of functional properties of the underlying brain networks when  
705 targeting the left posterior parietal cortex. Furthermore, ERPs in response to visual stimuli  
706 were modulated by alpha versus gamma tACS and were localized in left premotor cortex.  
707 These EEG results corroborate the notion of crucial interactions between parietal and  
708 premotor cortex during visuo-spatial attention. In addition, a correlation between electric  
709 field magnitudes in the left premotor cortex and the behavioral shift of attention indicates  
710 that a co-stimulation of the left premotor cortex might contribute to the observed tACS effects.  
711 In sum, our results support a role of neuronal alpha activity during covert visuo-spatial  
712 attention and suggest that the left dorsal attention network is especially susceptible to subtle  
713 tACS-neuromodulations during visuo-spatial attention.

714

## 715 **Declarations of interest**

716 CSH holds a patent on brain stimulation.

717

## 718 **CRedit authorship contribution statement**

719 **Jan-Ole Radecke:** Conceptualization, Methodology, Software, Investigation, Formal analysis,  
720 Writing - original draft, Writing - review & editing, Visualization. **Marina Fiene:**  
721 Conceptualization, Methodology, Writing - review & editing. **Jonas Misselhorn:**



722 Conceptualization, Methodology, Writing - review & editing. **Christoph S. Herrmann:** Writing  
723 - review & editing, Supervision. **Andreas K. Engel:** Writing - review & editing, Supervision,  
724 Resources. **Carsten H. Wolters:** Writing - review & editing, Supervision, Software. **Till R.**  
725 **Schneider:** Conceptualization, Methodology, Software, Writing - review & editing, Project  
726 administration, Funding acquisition.

727

## 728 **Acknowledgements**

729 This work was supported by the German Research Foundation (SFB 936 - 178316478 - A3 to  
730 TRS and AKE; SPP 1665 - SCHN/1511/1-2 to TRS; SPP1665 - EN 533/13-1 and SFB TRR 169 - B1  
731 to AKE; SPP1665 – WO 1425/5-2 and WO 1425/10-1 to CHW), by the Studienstiftung des  
732 deutschen Volkes (to MF) and by the Bundesministerium für Gesundheit (BMG) as project  
733 ZMI1-2521FSB006, under the frame of ERA PerMed as project ERAPERMED2020-227 (to  
734 CHW). We thank Karin Deazle and Rose Gholami for support with the recruitment of  
735 participants and EEG preparation, Jürgen Finsterbusch for technical support and Bettina  
736 Schwab for constructive discussions.

737

## 738 **References**

- 739 [1] Siegel M, Donner TH, Oostenveld R, Fries P, Engel AK. Neuronal Synchronization along the Dorsal Visual  
740 Pathway Reflects the Focus of Spatial Attention. *Neuron* 2008;60:709–19.  
741 doi:10.1016/j.neuron.2008.09.010.
- 742 [2] Marshall TR, Bergmann TO, Jensen O. Frontoparietal Structural Connectivity Mediates the Top-Down  
743 Control of Neuronal Synchronization Associated with Selective Attention. *PLOS Biol* 2015;13:e1002272.  
744 doi:10.1371/journal.pbio.1002272.
- 745 [3] Marshall TR, O’Shea J, Jensen O, Bergmann TO. Frontal Eye Fields Control Attentional Modulation of  
746 Alpha and Gamma Oscillations in Contralateral Occipitoparietal Cortex. *J Neurosci* 2015;35:1638–47.  
747 doi:10.1523/JNEUROSCI.3116-14.2015.
- 748 [4] Händel BF, Haarmeier T, Jensen O. Alpha Oscillations Correlate with the Successful Inhibition of  
749 Unattended Stimuli. *J Cogn Neurosci* 2011;23:2494–502. doi:10.1162/jocn.2010.21557.
- 750 [5] Popov T, Gips B, Kastner S, Jensen O. Spatial specificity of alpha oscillations in the human visual system.  
751 *Hum Brain Mapp* 2019;40:4432–40. doi:10.1002/hbm.24712.
- 752 [6] van Dijk H, van der Werf J, Mazaheri A, Medendorp WP, Jensen O. Modulations in oscillatory activity with  
753 amplitude asymmetry can produce cognitively relevant event-related responses. *Proc Natl Acad Sci*  
754 2010;107:900–5. doi:10.1073/pnas.0908821107.
- 755 [7] Gould IC, Rushworth MF, Nobre AC. Indexing the graded allocation of visuospatial attention using  
756 anticipatory alpha oscillations. *J Neurophysiol* 2011;105:1318–26. doi:10.1152/jn.00653.2010.
- 757 [8] Sauseng P, Klimesch W, Stadler W, Schabus M, Doppelmayr M, Hanslmayr S, et al. A shift of visual spatial  
758 attention is selectively associated with human EEG alpha activity. *Eur J Neurosci* 2005;22:2917–26.

- 759 doi:10.1111/j.1460-9568.2005.04482.x.
- 760 [9] Thut G, Nietzel A, Brandt SA, Pascual-Leone A.  $\alpha$ -Band electroencephalographic activity over occipital  
761 cortex indexes visuospatial attention bias and predicts visual target detection. *J Neurosci* 2006;26:9494–  
762 502. doi:10.1523/JNEUROSCI.0875-06.2006.
- 763 [10] Worden MS, Foxe JJ, Wang N, Simpson G V. Anticipatory Biasing of Visuospatial Attention Indexed by  
764 Retinotopically Specific  $\alpha$ -Bank Electroencephalography Increases over Occipital Cortex. *J Neurosci*  
765 2000;20:RC63–RC63. doi:10.1523/JNEUROSCI.20-06-j0002.2000.
- 766 [11] Kelly SP, Lalor EC, Reilly RB, Foxe JJ. Increases in Alpha Oscillatory Power Reflect an Active Retinotopic  
767 Mechanism for Distracter Suppression During Sustained Visuospatial Attention. *J Neurophysiol*  
768 2006;95:3844–51. doi:10.1152/jn.01234.2005.
- 769 [12] Rihs TA, Michel CM, Thut G. Mechanisms of selective inhibition in visual spatial attention are indexed by  
770 alpha-band EEG synchronization. *Eur J Neurosci* 2007;25:603–10. doi:10.1111/j.1460-9568.2007.05278.x.
- 771 [13] Klimesch W. Alpha-band oscillations, attention, and controlled access to stored information. *Trends Cogn*  
772 *Sci* 2012;16:606–17. doi:10.1016/j.tics.2012.10.007.
- 773 [14] Klimesch W, Sauseng P, Hanslmayr S. EEG alpha oscillations: The inhibition–timing hypothesis. *Brain Res*  
774 *Rev* 2007;53:63–88. doi:10.1016/j.brainresrev.2006.06.003.
- 775 [15] McDonald JJ, Green JJ. Isolating event-related potential components associated with voluntary control  
776 of visuo-spatial attention. *Brain Res* 2008;1227:96–109. doi:10.1016/j.brainres.2008.06.034.
- 777 [16] Vogel EK, Machizawa MG. Neural activity predicts individual differences in visual working memory  
778 capacity. *Nature* 2004;428:748–51. doi:10.1038/nature02447.
- 779 [17] Hillyard SA, Anllo-Vento L. Event-related brain potentials in the study of visual selective attention. *Proc*  
780 *Natl Acad Sci* 1998;95:781–7. doi:10.1073/pnas.95.3.781.
- 781 [18] Natale E, Marzi CA, Girelli M, Pavone EF, Pollmann S. ERP and fMRI correlates of endogenous and  
782 exogenous focusing of visual-spatial attention. *Eur J Neurosci* 2006;23:2511–21. doi:10.1111/j.1460-  
783 9568.2006.04756.x.
- 784 [19] Müller MM, Hillyard SA. Concurrent recording of steady-state and transient event-related potentials as  
785 indices of visual-spatial selective attention. *Clin Neurophysiol* 2000;111:1544–52. doi:10.1016/S1388-  
786 2457(00)00371-0.
- 787 [20] Fries P, Reynolds JH, Rorie AE, Desimone R. Modulation of Oscillatory Neuronal Synchronization by  
788 Selective Visual Attention. *Science* (80- ) 2001;291:1560–3. doi:10.1126/science.1055465.
- 789 [21] Gray CM, Singer W. Stimulus-specific neuronal oscillations in orientation columns of cat visual cortex.  
790 *Proc Natl Acad Sci* 1989;86:1698–702. doi:10.1073/pnas.86.5.1698.
- 791 [22] Johnson L, Alekseichuk I, Krieg J, Doyle A, Yu Y, Vitek J, et al. Dose-dependent effects of transcranial  
792 alternating current stimulation on spike timing in awake nonhuman primates. *Sci Adv* 2020;6:eaa2747.  
793 doi:10.1126/sciadv.aaz2747.
- 794 [23] Kasten FH, Duecker K, Maack MC, Meiser A, Herrmann CS. Integrating electric field modeling and  
795 neuroimaging to explain inter-individual variability of tACS effects. *Nat Commun* 2019;10:5427.  
796 doi:10.1038/s41467-019-13417-6.
- 797 [24] Krause MR, Vieira PG, Csorba BA, Pilly PK, Pack CC. Transcranial alternating current stimulation entrains  
798 single-neuron activity in the primate brain. *Proc Natl Acad Sci* 2019;116:5747–55.  
799 doi:10.1073/pnas.1815958116.
- 800 [25] Zaehle T, Rach S, Herrmann CS. Transcranial Alternating Current Stimulation Enhances Individual Alpha  
801 Activity in Human EEG. *PLoS One* 2010;5:e13766. doi:10.1371/journal.pone.0013766.

- 802 [26] Veniero D, Vossen A, Gross J, Thut G, Quentin R. Lasting EEG / MEG Aftereffects of Rhythmic Transcranial  
803 Brain Stimulation : Level of Control Over Oscillatory Network Activity. *Front Cell Neurosci* 2015;9.  
804 doi:10.3389/fncel.2015.00477.
- 805 [27] Neuling T, Rach S, Herrmann CS. Orchestrating neuronal networks: sustained after-effects of transcranial  
806 alternating current stimulation depend upon brain states. *Front Hum Neurosci* 2013;7:1–12.  
807 doi:10.3389/fnhum.2013.00161.
- 808 [28] Wischnewski M, Engelhardt M, Salehinejad MA, Schutter DJLG, Kuo MF, Nitsche MA. NMDA Receptor-  
809 Mediated Motor Cortex Plasticity After 20 Hz Transcranial Alternating Current Stimulation. *Cereb Cortex*  
810 2019;29:2924–31. doi:10.1093/cercor/bhy160.
- 811 [29] Kasten FH, Dowsett J, Herrmann CS. Sustained Aftereffect of  $\alpha$ -tACS Lasts Up to 70 min after Stimulation.  
812 *Front Hum Neurosci* 2016;10:1–9. doi:10.3389/fnhum.2016.00245.
- 813 [30] Schuhmann T, Kemmerer SK, Duecker F, de Graaf TA, ten Oever S, De Weerd P, et al. Left parietal tACS  
814 at alpha frequency induces a shift of visuospatial attention. *PLoS One* 2019;14:e0217729.  
815 doi:10.1371/journal.pone.0217729.
- 816 [31] Kasten FH, Wendeln T, Stecher HI, Herrmann CS. Hemisphere-specific, differential effects of lateralized,  
817 occipital–parietal  $\alpha$ - versus  $\gamma$ -tACS on endogenous but not exogenous visual-spatial attention. *Sci Rep*  
818 2020;10:12270. doi:10.1038/s41598-020-68992-2.
- 819 [32] Coldea A, Morand S, Veniero D, Harvey M, Thut G. Parietal alpha tACS shows inconsistent effects on  
820 visuospatial attention. *PLoS One* 2021;16:e0255424. doi:10.1371/journal.pone.0255424.
- 821 [33] Kemmerer SK, Sack AT, de Graaf TA, ten Oever S, De Weerd P, Schuhmann T. Frequency-specific  
822 transcranial neuromodulation of alpha power alters visuospatial attention performance. *Brain Res*  
823 2022;1782:147834. doi:10.1016/j.brainres.2022.147834.
- 824 [34] Veniero D, Benwell CSY, Ahrens MM, Thut G. Inconsistent effects of parietal  $\alpha$ -tACS on Pseudoneglect  
825 across two experiments: A failed internal replication. *Front Psychol* 2017;8:1–14.  
826 doi:10.3389/fpsyg.2017.00952.
- 827 [35] Schouwenburg MR Van, Zanto TP, Gazzaley A. Spatial Attention and the Effects of Frontoparietal Alpha  
828 Band Stimulation. *Front Hum Neurosci* 2017;10:1–11. doi:10.3389/fnhum.2016.00658.
- 829 [36] Schouwenburg MR Van, Sörensen LKA, De Klerk R, Reteig LC, Slagter HA. No Differential Effects of Two  
830 Different Alpha-Band Electrical Stimulation Protocols Over Fronto-Parietal Regions on Spatial Attention.  
831 *Front Neurosci* 2018;12:1–12. doi:10.3389/fnins.2018.00433.
- 832 [37] Hopfinger JB, Parsons J, Fröhlich F. Differential effects of 10-Hz and 40-Hz transcranial alternating current  
833 stimulation (tACS) on endogenous versus exogenous attention. *Cogn Neurosci* 2017;8:102–11.  
834 doi:10.1080/17588928.2016.1194261.
- 835 [38] Opitz A, Paulus W, Will S, Antunes A, Thielscher A. Determinants of the electric field during transcranial  
836 direct current stimulation. *Neuroimage* 2015;109:140–50. doi:10.1016/j.neuroimage.2015.01.033.
- 837 [39] Laakso I, Tanaka S, Koyama S, De Santis V, Hirata A. Inter-subject variability in electric fields of motor  
838 cortical tDCS. *Brain Stimul* 2015;8:906–13. doi:10.1016/j.brs.2015.05.002.
- 839 [40] Truong DQ, Magerowski G, Blackburn GL, Bikson M, Alonso-Alonso M. Computational modeling of  
840 transcranial direct current stimulation (tDCS) in obesity: Impact of head fat and dose guidelines.  
841 *NeuroImage Clin* 2013;2:759–66. doi:10.1016/j.nicl.2013.05.011.
- 842 [41] Dmochowski JP, Datta A, Huang Y, Richardson JD, Bikson M, Fridriksson J, et al. Targeted transcranial  
843 direct current stimulation for rehabilitation after stroke. *Neuroimage* 2013;75:12–9.  
844 doi:10.1016/j.neuroimage.2013.02.049.
- 845 [42] Wagner S, Rampersad SM, Aydin Ü, Vorwerk J, Oostendorp TF, Neuling T, et al. Investigation of tDCS  
846 volume conduction effects in a highly realistic head model. *J Neural Eng* 2014;11:016002.

- 847 doi:10.1088/1741-2560/11/1/016002.
- 848 [43] Huang Y, Liu AA, Lafon B, Friedman D, Dayan M, Wang X, et al. Measurements and models of electric  
849 fields in the in vivo human brain during transcranial electric stimulation. *Elife* 2017;6:1–27.  
850 doi:10.7554/elife.18834.
- 851 [44] Antonakakis M, Schrader S, Aydin Ü, Khan A, Gross J, Zervakis M, et al. Inter-Subject Variability of Skull  
852 Conductivity and Thickness in Calibrated Realistic Head Models. *Neuroimage* 2020;223:117353.  
853 doi:10.1016/j.neuroimage.2020.117353.
- 854 [45] Preisig BC, Hervais-Adelman A. The Predictive Value of Individual Electric Field Modeling for Transcranial  
855 Alternating Current Stimulation Induced Brain Modulation. *Front Cell Neurosci* 2022;16:1–13.  
856 doi:10.3389/fncel.2022.818703.
- 857 [46] Antonenko D, Thielscher A, Saturnino GB, Aydin S, Ittermann B, Grittner U, et al. Towards precise brain  
858 stimulation: Is electric field simulation related to neuromodulation? *Brain Stimul* 2019;12:1159–68.  
859 doi:10.1016/j.brs.2019.03.072.
- 860 [47] Radecke J-O, Khan A, Engel AK, Wolters CH, Schneider TR. Individual Targeting Increases Control Over  
861 Inter-Individual Variability in Simulated Transcranial Electric Fields. *IEEE Access* 2020;8:182610–24.  
862 doi:10.1109/ACCESS.2020.3028618.
- 863 [48] Mohd Zulkifly MF, Lehr A, van de Velden D, Khan A, Focke NK, Wolters CH, et al. Directionality of the  
864 injected current targeting the P20/N20 source determines the efficacy of 140 Hz transcranial alternating  
865 current stimulation (tACS)-induced aftereffects in the somatosensory cortex. *PLoS One*  
866 2022;17:e0266107. doi:10.1371/journal.pone.0266107.
- 867 [49] Thiebaut de Schotten M, Dell’Acqua F, Forkel S, Simmons A, Vergani F, Murphy DGM, et al. A Lateralized  
868 Brain Network for Visuo-Spatial Attention. *Nat Preced* 2011. doi:10.1038/npre.2011.5549.1.
- 869 [50] D’Andrea A, Chella F, Marshall TR, Pizzella V, Romani GL, Jensen O, et al. Alpha and alpha-beta phase  
870 synchronization mediate the recruitment of the visuospatial attention network through the Superior  
871 Longitudinal Fasciculus. *Neuroimage* 2019;188:722–32. doi:10.1016/j.neuroimage.2018.12.056.
- 872 [51] Green JJ, McDonald JJ. Electrical Neuroimaging Reveals Timing of Attentional Control Activity in Human  
873 Brain. *PLoS Biol* 2008;6:e81. doi:10.1371/journal.pbio.0060081.
- 874 [52] Jensen O, Mazaheri A. Shaping Functional Architecture by Oscillatory Alpha Activity: Gating by Inhibition.  
875 *Front Hum Neurosci* 2010;4:1–8. doi:10.3389/fnhum.2010.00186.
- 876 [53] Wöstmann M, Vosskuhl J, Obleser J, Herrmann CS. Opposite effects of lateralised transcranial alpha  
877 versus gamma stimulation on auditory spatial attention. *Brain Stimul* 2018;11:752–8.  
878 doi:10.1016/j.brs.2018.04.006.
- 879 [54] Donner TH, Siegel M, Oostenveld R, Fries P, Bauer M, Engel AK. Population Activity in the Human Dorsal  
880 Pathway Predicts the Accuracy of Visual Motion Detection. *J Neurophysiol* 2007;98:345–59.  
881 doi:10.1152/jn.01141.2006.
- 882 [55] Siegel M, Donner TH, Oostenveld R, Fries P, Engel AK. High-Frequency Activity in Human Visual Cortex Is  
883 Modulated by Visual Motion Strength. *Cereb Cortex* 2007;17:732–41. doi:10.1093/cercor/bhk025.
- 884 [56] Kaernbach C. Simple adaptive testing with the weighted up-down method. *Percept Psychophys*  
885 1991;49:227–9. doi:10.3758/BF03214307.
- 886 [57] Brainard DH. The Psychophysics Toolbox. *Spat Vis* 1997;10:433–6. doi:10.1163/156856897X00357.
- 887 [58] Pelli DG. The VideoToolbox software for visual psychophysics: transforming numbers into movies. *Spat*  
888 *Vis* 1997;10:437–42. doi:10.1163/156856897X00366.
- 889 [59] Huang Y, Dmochowski JP, Su Y, Datta A, Rorden C, Parra LC. Automated MRI segmentation for  
890 individualized modeling of current flow in the human head. *J Neural Eng* 2013;10. doi:10.1088/1741-

- 891 2560/10/6/066004.
- 892 [60] Nielsen JD, Madsen KH, Puonti O, Siebner HR, Bauer C, Madsen CG, et al. Automatic skull segmentation  
893 from MR images for realistic volume conductor models of the head: Assessment of the state-of-the-art.  
894 Neuroimage 2018;174:587–98. doi:10.1016/j.neuroimage.2018.03.001.
- 895 [61] Wolters CH, Anwander A, Berti G, Hartmann U. Geometry-Adapted Hexahedral Meshes Improve  
896 Accuracy of Finite-Element-Method-Based EEG Source Analysis. IEEE Trans Biomed Eng 2007;54:1446–  
897 53. doi:10.1109/TBME.2007.890736.
- 898 [62] Pursiainen S, Agsten B, Wagner S, Wolters CH. Advanced Boundary Electrode Modeling for tES and  
899 Parallel tES/EEG. IEEE Trans Neural Syst Rehabil Eng 2018;26:37–44. doi:10.1109/TNSRE.2017.2748930.
- 900 [63] Pascual-Marqui RD. Discrete, 3D distributed, linear imaging methods of electric neuronal activity. Part 1:  
901 exact, zero error localization 2007:1–16.
- 902 [64] Khan A, Antonakakis M, Vogenauer N, Hauelsen J, Wolters CH. Individually optimized multi-channel tDCS  
903 for targeting somatosensory cortex. Clin Neurophysiol 2022;134:9–26. doi:10.1016/j.clinph.2021.10.016.
- 904 [65] Khan A, Antonakakis M, Suntrup-Krueger S, Lencer R, Nitsche MA, Paulus W, et al. Can individually  
905 targeted and optimized multi-channel tDCS outperform standard bipolar tDCS in stimulating the primary  
906 somatosensory cortex? Brain Stimul 2023;16:1–16. doi:10.1016/j.brs.2022.12.006.
- 907 [66] Kar K, Duijnhouwer J, Krekelberg B. Transcranial Alternating Current Stimulation Attenuates Neuronal  
908 Adaptation. J Neurosci 2017;37:2325–35. doi:10.1523/JNEUROSCI.2266-16.2016.
- 909 [67] Kar K, Krekelberg B. Transcranial Alternating Current Stimulation Attenuates Visual Motion Adaptation. J  
910 Neurosci 2014;34:7334–40. doi:10.1523/JNEUROSCI.5248-13.2014.
- 911 [68] Vieira P, Krause M, Pack C. tACS entrains neural activity while somatosensory input is blocked 2019.  
912 doi:10.1101/691022.
- 913 [69] Macmillan NA, Creelman DC. Detection Theory: A user’s guide. 2nd ed. Mahwah, NJ: Lawrence Erlbaum  
914 Associates; 2005.
- 915 [70] Noury N, Siegel M. Phase properties of transcranial electrical stimulation artifacts in electrophysiological  
916 recordings. Neuroimage 2017;158:406–16. doi:10.1016/j.neuroimage.2017.07.010.
- 917 [71] Noury N, Hipp JF, Siegel M. Physiological processes non-linearly affect electrophysiological recordings  
918 during transcranial electric stimulation. Neuroimage 2016;140:99–109.  
919 doi:10.1016/j.neuroimage.2016.03.065.
- 920 [72] Delorme A, Makeig S. EEGLAB: an open source toolbox for analysis of single-trial EEG dynamics including  
921 independent component analysis. J Neurosci Methods 2004;134:9–21.
- 922 [73] Oostenveld R, Fries P, Maris E, Schoffelen J-M. FieldTrip: Open Source Software for Advanced Analysis of  
923 MEG, EEG, and Invasive Electrophysiological Data. Comput Intell Neurosci 2011;2011:1–9.  
924 doi:10.1155/2011/156869.
- 925 [74] Nolte G. MEG & EEG Toolbox of Hamburg (METH) n.d. [https://www.uke.de/english/departments-](https://www.uke.de/english/departments-institutes/institutes/neurophysiology-and-pathophysiology/research/working-groups/index.html)  
926 [institutes/institutes/neurophysiology-and-pathophysiology/research/working-groups/index.html](https://www.uke.de/english/departments-institutes/institutes/neurophysiology-and-pathophysiology/research/working-groups/index.html)  
927 (accessed May 13, 2019).
- 928 [75] Hipp JF, Engel AK, Siegel M. Oscillatory Synchronization in Large-Scale Cortical Networks Predicts  
929 Perception. Neuron 2011;69:387–96. doi:10.1016/j.neuron.2010.12.027.
- 930 [76] Westner BU, Dalal SS, Gramfort A, Litvak V, Mosher JC, Oostenveld R, et al. A unified view on  
931 beamformers for M/EEG source reconstruction. Neuroimage 2022;246:118789.  
932 doi:10.1016/j.neuroimage.2021.118789.
- 933 [77] Corbetta M, Shulman GL. Control of goal-directed and stimulus-driven attention in the brain. Nat Rev

- 934 Neurosci 2002;3:201–15. doi:10.1038/nrn755.
- 935 [78] Tzourio-Mazoyer N, Landeau B, Papathanassiou D, Crivello F, Etard O, Delcroix N, et al. Automated  
936 Anatomical Labeling of Activations in SPM Using a Macroscopic Anatomical Parcellation of the MNI MRI  
937 Single-Subject Brain. *Neuroimage* 2002;15:273–89. doi:10.1006/nimg.2001.0978.
- 938 [79] Maris E, Oostenveld R. Nonparametric statistical testing of EEG- and MEG-data. *J Neurosci Methods*  
939 2007;164:177–90. doi:10.1016/j.jneumeth.2007.03.024.
- 940 [80] Holm S. A Simple Sequentially Rejective Multiple Test Procedure. *Scand J Stat* 1979;6:65–70.
- 941 [81] Bonnefond M, Kastner S, Jensen O. Communication between Brain Areas Based on Nested Oscillations.  
942 *Eneuro* 2017;4:ENEURO.0153-16.2017. doi:10.1523/ENEURO.0153-16.2017.
- 943 [82] Jensen O, Gips B, Bergmann TO, Bonnefond M. Temporal coding organized by coupled alpha and gamma  
944 oscillations prioritize visual processing. *Trends Neurosci* 2014;37:357–69. doi:10.1016/j.tins.2014.04.001.
- 945 [83] Haegens S, Nacher V, Luna R, Romo R, Jensen O.  $\alpha$ -Oscillations in the monkey sensorimotor network  
946 influence discrimination performance by rhythmical inhibition of neuronal spiking. *Proc Natl Acad Sci*  
947 2011;108:19377–82. doi:10.1073/pnas.1117190108.
- 948 [84] Romei V, Brodbeck V, Michel C, Amedi A, Pascual-Leone A, Thut G. Spontaneous Fluctuations in Posterior  
949 -Band EEG Activity Reflect Variability in Excitability of Human Visual Areas. *Cereb Cortex* 2008;18:2010–  
950 8. doi:10.1093/cercor/bhm229.
- 951 [85] Spaak E, Bonnefond M, Maier A, Leopold DA, Jensen O. Layer-Specific Entrainment of Gamma-Band  
952 Neural Activity by the Alpha Rhythm in Monkey Visual Cortex. *Curr Biol* 2012;22:2313–8.  
953 doi:10.1016/j.cub.2012.10.020.
- 954 [86] Misselhorn J, Schwab BC, Schneider TR, Engel AK. Synchronization of Sensory Gamma Oscillations  
955 Promotes Multisensory Communication. *Eneuro* 2019;6:ENEURO.0101-19.2019.  
956 doi:10.1523/ENEURO.0101-19.2019.
- 957 [87] Bagherzadeh Y, Baldauf D, Pantazis D, Desimone R. Alpha Synchrony and the Neurofeedback Control of  
958 Spatial Attention. *Neuron* 2020;105:577-587.e5. doi:10.1016/j.neuron.2019.11.001.
- 959 [88] Vossen A, Gross J, Thut G. Alpha Power Increase After Transcranial Alternating Current Stimulation at  
960 Alpha Frequency ( $\alpha$ -tACS) Reflects Plastic Changes Rather Than Entrainment. *Brain Stimul* 2015;8:499–  
961 508. doi:10.1016/j.brs.2014.12.004.
- 962 [89] Schwab BC, Misselhorn J, Engel AK. Modulation of large-scale cortical coupling by transcranial alternating  
963 current stimulation. *Brain Stimul* 2019;12:1187–96. doi:10.1016/j.brs.2019.04.013.
- 964 [90] Fiene M, Schwab BC, Misselhorn J, Herrmann CS, Schneider TR, Engel AK. Phase-specific manipulation of  
965 rhythmic brain activity by transcranial alternating current stimulation. *Brain Stimul* 2020;13:1254–62.  
966 doi:10.1016/j.brs.2020.06.008.
- 967 [91] Polich J. Updating P300: An integrative theory of P3a and P3b. *Clin Neurophysiol* 2007;118:2128–48.  
968 doi:10.1016/j.clinph.2007.04.019.
- 969 [92] Kok A. On the utility of P3 amplitude as a measure of processing capacity. *Psychophysiology* 2001;38.  
970 doi:10.1017/S0048577201990559.
- 971 [93] Debener S, Kranczioch C, Herrmann CS, Engel AK. Auditory novelty oddball allows reliable distinction of  
972 top-down and bottom-up processes of attention. *Int J Psychophysiol* 2002;46:77–84.  
973 doi:10.1016/S0167-8760(02)00072-7.
- 974 [94] Debener S, Makeig S, Delorme A, Engel AK. What is novel in the novelty oddball paradigm? Functional  
975 significance of the novelty P3 event-related potential as revealed by independent component analysis.  
976 *Cogn Brain Res* 2005;22:309–21. doi:10.1016/j.cogbrainres.2004.09.006.

- 977 [95] Donner TH, Kettermann A, Diesch E, Ostendorf F, Villringer A, Brandt SA. Involvement of the human  
978 frontal eye field and multiple parietal areas in covert visual selection during conjunction search. *Eur J*  
979 *Neurosci* 2000;12:3407–14. doi:10.1046/j.1460-9568.2000.00223.x.
- 980 [96] Corbetta M, Akbudak E, Conturo TE, Snyder AZ, Ollinger JM, Drury HA, et al. A Common Network of  
981 Functional Areas for Attention and Eye Movements. *Neuron* 1998;21:761–73. doi:10.1016/S0896-  
982 6273(00)80593-0.
- 983 [97] Weilke F, Spiegel S, Boecker H, von Einsiedel HG, Conrad B, Schwaiger M, et al. Time-Resolved fMRI of  
984 Activation Patterns in M1 and SMA During Complex Voluntary Movement. *J Neurophysiol* 2001;85:1858–  
985 63. doi:10.1152/jn.2001.85.5.1858.
- 986 [98] Nachev P, Kennard C, Husain M. Functional role of the supplementary and pre-supplementary motor  
987 areas. *Nat Rev Neurosci* 2008;9:856–69. doi:10.1038/nrn2478.
- 988 [99] Kastner S, Pinsk MA, De Weerd P, Desimone R, Ungerleider LG. Increased Activity in Human Visual Cortex  
989 during Directed Attention in the Absence of Visual Stimulation. *Neuron* 1999;22:751–61.  
990 doi:10.1016/S0896-6273(00)80734-5.
- 991 [100] Hopfinger JB, Buonocore MH, Mangun GR. The neural mechanisms of top-down attentional control. *Nat*  
992 *Neurosci* 2000;3:284–91. doi:10.1038/72999.
- 993 [101] Belyusar D, Snyder AC, Frey H-P, Harwood MR, Wallman J, Foxe JJ. Oscillatory alpha-band suppression  
994 mechanisms during the rapid attentional shifts required to perform an anti-saccade task. *Neuroimage*  
995 2013;65:395–407. doi:10.1016/j.neuroimage.2012.09.061.
- 996 [102] Popov T, Miller GA, Rockstroh B, Jensen O, Langer N. Alpha oscillations link action to cognition: An  
997 oculomotor account of the brain’s dominant rhythm. *BioRxiv* 2021:2021.09.24.461634.  
998 doi:10.1101/2021.09.24.461634.
- 999 [103] Craighero L, Rizzolatti G. The Premotor Theory of Attention. *Neurobiol. Atten., Elsevier*; 2005, p. 181–6.  
1000 doi:10.1016/B978-012375731-9/50035-5.
- 1001 [104] Rizzolatti G, Riggio L, Dascola I, Umiltá C. Reorienting attention across the horizontal and vertical  
1002 meridians: Evidence in favor of a premotor theory of attention. *Neuropsychologia* 1987;25:31–40.  
1003 doi:10.1016/0028-3932(87)90041-8.
- 1004 [105] Veniero D, Gross J, Morand S, Duecker F, Sack AT, Thut G. Top-down control of visual cortex by the frontal  
1005 eye fields through oscillatory realignment. *Nat Commun* 2021;12:1757. doi:10.1038/s41467-021-21979-  
1006 7.
- 1007 [106] Misselhorn J, Fries U, Engel AK. Frontal and parietal alpha oscillations reflect attentional modulation of  
1008 cross-modal matching. *Sci Rep* 2019;9:5030. doi:10.1038/s41598-019-41636-w.
- 1009 [107] Lobier M, Palva JM, Palva S. High-alpha band synchronization across frontal, parietal and visual cortex  
1010 mediates behavioral and neuronal effects of visuospatial attention. *Neuroimage* 2018;165:222–37.  
1011 doi:10.1016/j.neuroimage.2017.10.044.
- 1012 [108] Dmochowski JP, Datta A, Bikson M, Su Y, Parra LC. Optimized multi-electrode stimulation increases  
1013 focality and intensity at target. *J Neural Eng* 2011;8. doi:10.1088/1741-2560/8/4/046011.
- 1014 [109] Reato D, Rahman A, Bikson M, Parra LC. Effects of weak transcranial alternating current stimulation on  
1015 brain activity—a review of known mechanisms from animal studies. *Front Hum Neurosci* 2013;7:1–8.  
1016 doi:10.3389/fnhum.2013.00687.
- 1017 [110] Alagapan S, Schmidt SL, Lefebvre J, Hadar E, Shin HW, Fröhlich F. Modulation of Cortical Oscillations by  
1018 Low-Frequency Direct Cortical Stimulation Is State-Dependent. *PLoS Biol* 2016;14:1–21.  
1019 doi:10.1371/journal.pbio.1002424.
- 1020 [111] Fiene M, Radecke J-O, Misselhorn J, Sengelmann M, Herrmann CS, Schneider TR, et al. tACS phase-  
1021 specifically biases brightness perception of flickering light. *Brain Stimul* 2022;15:244–53.

1022 doi:10.1016/j.brs.2022.01.001.

1023 [112] Kronberg G, Rahman A, Sharma M, Bikson M, Parra LC. Direct current stimulation boosts hebbian  
1024 plasticity in vitro. *Brain Stimul* 2020;13:287–301. doi:10.1016/j.brs.2019.10.014.

1025 [113] Francis JT, Gluckman BJ, Schiff SJ. Sensitivity of Neurons to Weak Electric Fields. *J Neurosci* 2003;23:7255–  
1026 61. doi:10.1523/JNEUROSCI.23-19-07255.2003.

1027 [114] Vernet M, Quentin R, Chanes L, Mitsumasu A, Valero-Cabré A. Frontal eye field, where art thou? Anatomy,  
1028 function, and non-invasive manipulation of frontal regions involved in eye movements and associated  
1029 cognitive operations. *Front Integr Neurosci* 2014;8:1–24. doi:10.3389/fnint.2014.00066.

1030
